# Supplementary material for: Plasma Proteins Associated with COVID-19 Severity in Puerto Rico
Source: MDPI journal article supplement (doi:10.3390/ijms25105426), 2024-05-16
Supplement: s1 [file s1]

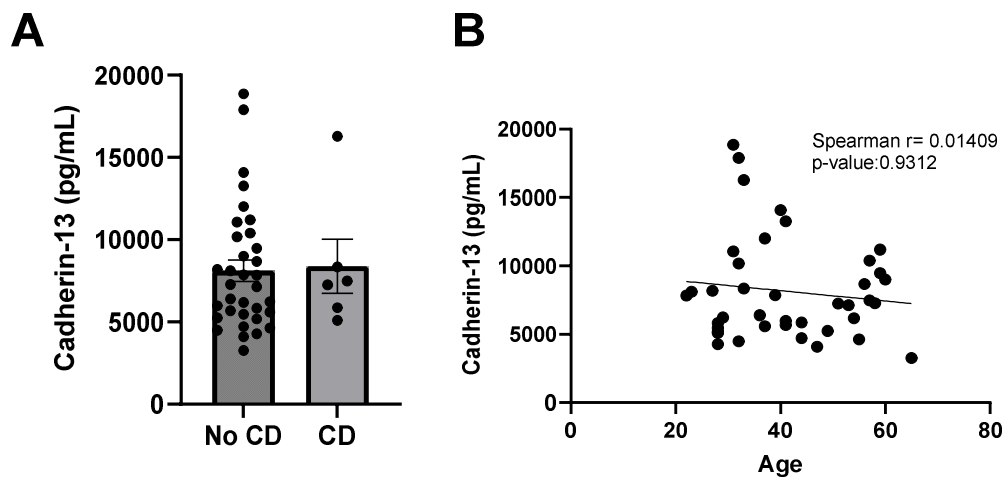

**Figure S1.** Association of Cardiovascular Disease (CD) and Age with Cadherin-13 levels. Plasma samples from unvaccinated healthy controls ( $n=8$ ) and COVID-19 positive patients stratified by severity (Mild:  $n=12$ , Moderate:  $n=12$ , and Severe:  $n=8$ ) were randomly selected for validation using a human Cadherin-13 ELISA. A. Comparison of Cadherin-13 levels between participants with No CD ( $n=34$ ) and CD ( $n=6$ ), independently of COVID-19 positivity status. The mean  $\pm$  SEM is shown. B. Correlation of age vs cadherin-13 levels in all participants included in the Cadherin-13 ELISA ( $n=40$ ), independent of COVID-19 positivity status.

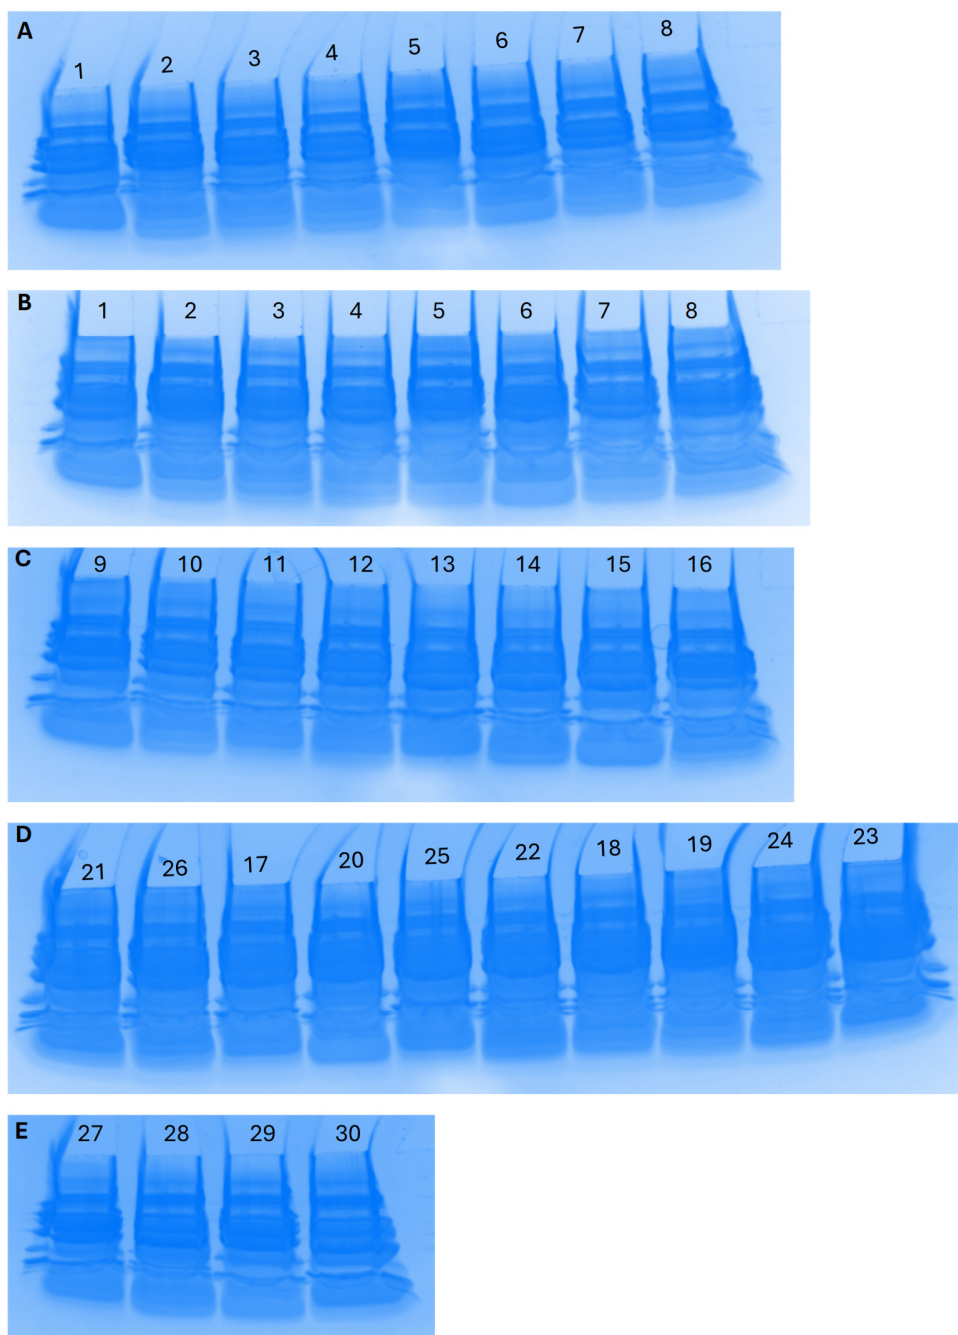

**Figure S2.** Coomassie-Stained Gels. Short-run electrophoresis at 150V for 15min with 100ug of total protein ( $n=30$ ) was performed and gels were stained with Coomassie to cut out proteome bands. COVID-19 negative samples ( $n=8$ ) were run in duplicates (A and B) to have sufficient material for an internal control for the TMT. Gel C contains Mild COVID-19 positive patients ( $n=8$ ). Gel D contains Moderate COVID-19 positive patients ( $n=10$ ). Gel E contains Severe COVID-19 positive patients ( $n=4$ ). Each lane is numbered with the corresponding participant's number according to Table S9.
