# Supplementary material for: Plasma Proteins Associated with COVID-19 Severity in Puerto Rico
Source: MDPI journal article supplement (doi:10.3390/ijms25105426), 2024-05-16
Supplement: s1 [file s1]

| A. TMT - 1 |                   |                                     |
|------------|-------------------|-------------------------------------|
| TMT Label  | Sample ID         | Category                            |
| 126        | <i>Aliquot #1</i> | <i>Internal Pool (All Controls)</i> |
| 127N       | 1                 | COVID-19 Negative                   |
| 127C       | 2                 | COVID-19 Negative                   |
| 128N       | 3                 | COVID-19 Negative                   |
| 128C       | 9                 | COVID-19 Mild                       |
| 129N       | 10                | COVID-19 Mild                       |
| 129C       | 11                | COVID-19 Mild                       |
| 130N       | 17                | COVID-19 Moderate                   |
| 130C       | 18                | COVID-19 Moderate                   |
| 131N       | 19                | COVID-19 Moderate                   |
| 131C       | 27                | COVID-19 Severe                     |
| B. TMT - 2 |                   |                                     |
| TMT Label  | Sample ID         | Category                            |
| 126        | <i>Aliquot #2</i> | <i>Internal Pool (All Controls)</i> |
| 127N       | 28                | COVID-19 Severe                     |
| 127C       | 4                 | COVID-19 Negative                   |
| 128N       | 5                 | COVID-19 Negative                   |
| 128C       | 6                 | COVID-19 Negative                   |
| 129N       | 12                | COVID-19 Mild                       |
| 129C       | 13                | COVID-19 Mild                       |
| 130N       | 14                | COVID-19 Mild                       |
| 130C       | 20                | COVID-19 Moderate                   |
| 131N       | 21                | COVID-19 Moderate                   |
| 131C       | 22                | COVID-19 Moderate                   |
| C. TMT - 3 |                   |                                     |
| TMT Label  | Sample ID         | Category                            |
| 126        | <i>Aliquot #3</i> | <i>Internal Pool (All Controls)</i> |
| 127N       | 23                | COVID-19 Moderate                   |
| 127C       | 24                | COVID-19 Moderate                   |
| 128N       | 25                | COVID-19 Moderate                   |
| 128C       | 26                | COVID-19 Moderate                   |
| 129N       | 29                | COVID-19 Severe                     |
| 129C       | 30                | COVID-19 Severe                     |
| 130N       | 15                | COVID-19 Mild                       |
| 130C       | 16                | COVID-19 Mild                       |
| 131N       | 7                 | COVID-19 Negative                   |
| 131C       | 8                 | COVID-19 Negative                   |

**Table S10. TMT Labeling Design.** Plasma aliquoted samples from 22 (n = 22) unvaccinated COVID-19 patients stratified by disease severity and negative controls (n=8) were randomly selected for quantitative proteomics studies. Samples were assayed in three 11-plex TMT kits

as depicted in A, B, and C. These participants were controlled by age, sex, and comorbidities and numbered (Sample ID) according to Table S9. COVID-19 patients were stratified as follows: mild ( $n = 8$ ), moderate ( $n = 10$ ), and severe ( $n = 4$ ) disease. Controls included eight ( $n=8$ ) COVID-19 negative participants. To obtain the Internal Pool an additional aliquot of all COVID-19 negative control samples that are mixed in one tube; then the volume in this tube is divided into three equal aliquots that are included in each of the three kits (one aliquot per kit) to enable data comparison between all kits. The samples included in the Internal Pool come from the following COVID-19 negative participants: 1, 2, 3, 4, 5, 6, 7, and 8.
