# Supplementary material for: Plasma Proteins Associated with COVID-19 Severity in Puerto Rico
Source: MDPI journal article supplement (doi:10.3390/ijms25105426), 2024-05-16
Supplement: s1 [file s1]

**Table S9. Characteristics of participants included in TMT Labeling Proteomics**

| <b>COVID-19 Negative (<i>n</i> = 8)</b>           | <b>Age</b> | <b>Sex (F/M)</b> | <b>Comorbidities</b>                                              | <b>Clinical Symptoms</b>                                                                         |
|---------------------------------------------------|------------|------------------|-------------------------------------------------------------------|--------------------------------------------------------------------------------------------------|
| 1                                                 | 32         | M                | Prostate cancer                                                   | N/A                                                                                              |
| 2                                                 | 28         | F                | N/A                                                               | N/A                                                                                              |
| 3                                                 | 56         | F                | N/A                                                               | N/A                                                                                              |
| 4                                                 | 22         | F                | N/A                                                               | N/A                                                                                              |
| 5                                                 | 59         | M                | N/A                                                               | N/A                                                                                              |
| 6                                                 | 49         | F                | N/A                                                               | N/A                                                                                              |
| 7                                                 | 32         | F                | N/A                                                               | N/A                                                                                              |
| 8                                                 | 31         | M                | N/A                                                               | N/A                                                                                              |
| <b>COVID-19 Positive Mild (<i>n</i> = 8)</b>      |            |                  |                                                                   |                                                                                                  |
| 9                                                 | 40         | F                | Oral herpes                                                       | Cough, headaches, muscle ache, loss of smell, loss of taste                                      |
| 10                                                | 28         | F                | N/A                                                               | Cough, headache                                                                                  |
| 11                                                | 36         | M                | N/A                                                               | Loss of smell, cough, fever, headache, muscle ache                                               |
| 12                                                | 55         | F                | Autoimmune disease, diabetes, high blood pressure, kidney disease | Cough, shortness of breath, headache                                                             |
| 13                                                | 41         | M                | N/A                                                               | Loss of smell, loss of taste, muscle ache, fever, cough                                          |
| 14                                                | 32         | M                | HIV/AIDS                                                          | Fever, headache                                                                                  |
| 15                                                | 47         | F                | N/A                                                               | Loss of smell, loss of taste, cough                                                              |
| 16                                                | 37         | M                | N/A                                                               | Muscle ache, cough, fever, headache                                                              |
| <b>COVID-19 Positive Moderate (<i>n</i> = 10)</b> |            |                  |                                                                   |                                                                                                  |
| 17                                                | 39         | F                | Oral herpes                                                       | Cough, fever, Shortness of breath, muscle ache, headache, diarrhea, loss of taste, loss of smell |
| 18                                                | 41         | M                | N/A                                                               | Loss of smell, loss of taste, muscle ache, fever, headache, sore throat, abdominal pain          |
| 19                                                | 37         | M                | N/A                                                               | Loss of smell, loss of taste, muscle ache, cough, fever, sore throat, diarrhea, nausea, fatigue  |
| 20                                                | 31         | F                | Autoimmune disease, high blood pressure, kidney disease           | Loss of smell, loss of taste, muscle ache, cough, fever, headache, chest pain                    |
| 21                                                | 27         | F                | N/A                                                               | Loss of smell, loss of taste, muscle ache, headache, chest pain, nausea,                         |
| 22                                                | 28         | M                | Autoimmune disease                                                | Muscle ache, cough, shortness of breath, fever, headache, chest pain                             |
| 23                                                | 51         | M                | Cardiovascular disease,                                           | Loss of smell, loss of taste, cough, fever, shortness of breath, headache, muscle ache           |
| 24                                                | 33         | M                | Cardiovascular disease, lung disease                              | Shortness of breath. Required an oxygen mask without the need for hospitalization.               |
| 25                                                | 58         | F                | N/A                                                               | Loss of smell, loss of taste, cough, fever, muscle ache, shortness of breath, headache           |
| 26                                                | 28         | F                | N/A                                                               | Loss of smell, loss of taste, muscle ache, fatigue, sore throat, diarrhea                        |

| COVID-19 Positive<br>Severe ( <i>n</i> = 4) |               |               |                                  |                                                                                  |
|---------------------------------------------|---------------|---------------|----------------------------------|----------------------------------------------------------------------------------|
| 27                                          | 54            | F             | Cancer                           | Cough, fever, shortness of breath, headache,<br>diarrhea, nausea, abdominal pain |
| 28                                          | 47            | M             | N/A                              | Cough, fever, fatigue                                                            |
| 29                                          | 65            | F             | N/A                              | Muscle ache, shortness of breath, chest pain,<br>fatigue, sore throat, diarrhea  |
| 30                                          | 60            | M             | Diabetes, high blood<br>pressure | Headache , diarrhea                                                              |
| <b>p-value</b>                              | <b>0.0790</b> | <b>0.9467</b> | <b>0.3785</b>                    |                                                                                  |
