# Supplementary material for: Plasma Proteins Associated with COVID-19 Severity in Puerto Rico
Source: Int J Mol Sci. 2024 May 16;25(10):5426. doi: 10.3390/ijms25105426 (PMC11121485; doi:10.3390/ijms25105426)
Supplement: Supplementary file 1 [file ijms-25-05426-s001.zip]

Archive with 11 entries (11 files):
- Supplementary Figures.pdf
- Table S10-TMT Labeling Design.pdf
- Table S1-Proteomics studies of COVID-19 severity.pdf
- Table S2-Mild vs COVID-19 negative.xlsx
- Table S3-Moderate vs COVID-19 negative.xlsx
- Table S4-Severe vs COVID-19 negative.xlsx
- Table S5-LXR-RXR Activation.xlsx
- Table S6-Production of NO and ROS in Macrophages.xlsx
- Table S7-Synaptogenesis Signaling Pathway.xlsx
- Table S8-Proteins Selected for Validation.xlsx
- Table S9-Demographics of Patients included in TMT.pdf
