# Supplementary material for: Plasma Proteins Associated with COVID-19 Severity in Puerto Rico
Source: Int J Mol Sci. 2024 May 16;25(10):5426. doi: 10.3390/ijms25105426 (PMC11121485; doi:10.3390/ijms25105426)
Supplement: Supplementary file 1 [file ijms-25-05426-s001.zip › Table S3-Moderate vs COVID-19 negative.xlsx]

## Sheet: Moderate vs Controls
Accession	Gene.Symbol	FC	P.Value	Significance	Description	Biological.Process	Cellular.Component	Molecular.Function	Pfam.IDs	Entrez.Gene.ID	Gene.ID	Ensembl.Gene.ID	WikiPathways	Reactome.Pathways		Legend
P02042	HBD	1.69949	0.000427502	Up	Hemoglobin subunit delta [OS=Homo sapiens]	other metabolic processes;transport;other biological processes	cytosol;other cell component	other molecular function	Pf00042	3045	hsa:3045; P02042; Q3Y5H3; Q8WXT7	ENSG00000223609	VEGFA-VEGFR2 signaling pathway	Factors involved in megakaryocyte development and platelet production			Up-regulatedwith a FC ≥ 1.5 and p-value ≤ 0.05
P69905	HBA1; HBA2	1.54216	0.0035156	Up	Hemoglobin subunit alpha [OS=Homo sapiens]	other metabolic processes;stress response;transport;other biological processes	non-structural extracellular;cytosol;translational apparatus;other cell component	other molecular function	Pf00042	3039; 3040	hsa:3039; hsa:3040; P01922; P69905; Q1HDT5; Q3MIF5; Q53F97; Q96KF1; Q9NYR7; Q9UCM0	ENSG00000188536; ENSG00000206172	Selenium micronutrient network; Vitamin B12 metabolism; Folate metabolism; Effects of nitric oxide	Scavenging of heme from plasma; Erythrocytes take up carbon dioxide and release oxygen; Erythrocytes take up oxygen and release carbon dioxide; Heme signaling; Cytoprotection by HMOX1			Not Significant
P68871	HBB	1.53163	0.00702038	Up	Hemoglobin subunit beta [OS=Homo sapiens]	other metabolic processes;stress response;transport;other biological processes	non-structural extracellular;cytosol;other cell component	other molecular function	Pf00042	3043	A4GX73; B2ZUE0; hsa:3043; P02023; P68871; Q13852; Q14481; Q14510; Q45KT0; Q549N7; Q6FI08; Q6R7N2; Q8IZI1; Q9BX96; Q9UCD6; Q9UCP8; Q9UCP9	ENSG00000244734	Selenium micronutrient network; Vitamin B12 metabolism; Folate metabolism	Scavenging of heme from plasma; Neutrophil degranulation; Erythrocytes take up carbon dioxide and release oxygen; Erythrocytes take up oxygen and release carbon dioxide; Factors involved in megakaryocyte development and platelet production; Heme signaling; Cytoprotection by HMOX1; Late endosomal microautophagy; Chaperone Mediated Autophagy			Down-regulated FC ≤ -1.5 and p-value ≤ 0.05
A0A0B4J1U7	IGHV6-1	1.49196	0.000121138	Not Significant	Immunoglobulin heavy variable 6-1 [OS=Homo sapiens]	cell organization and biogenesis;stress response;transport;signal transduction;other biological processes	non-structural extracellular;plasma membrane;other membranes	signal transduction activity or receptor binding;other molecular function	Pf07686		A0A0B4J1U7	ENSG00000211933; ENSG00000282745
P02743	APCS	1.45974	0.00693705	Not Significant	Serum amyloid P-component [OS=Homo sapiens]	cell organization and biogenesis;stress response;other biological processes	non-structural extracellular	other molecular function	Pf00354	325	hsa:325; P02743	ENSG00000132703	Complement system	Amyloid fiber formation
P06312	IGKV4-1	1.41892	0.000226748	Not Significant	Immunoglobulin kappa variable 4-1 [OS=Homo sapiens]	other biological processes	non-structural extracellular;plasma membrane;other membranes;other cell component	other molecular function	Pf07686		P01625; P06312; P06313; P06314; P83593	ENSG00000211598		Initial triggering of complement; Classical antibody-mediated complement activation; Immunoregulatory interactions between a Lymphoid and a non-Lymphoid cell; Cell surface interactions at the vascular wall; FCGR activation; Regulation of actin dynamics for phagocytic cup formation; Role of phospholipids in phagocytosis; Scavenging of heme from plasma; Role of LAT2/NTAL/LAB on calcium mobilization…
P00915	CA1	1.37265	0.0115	Not Significant	Carbonic anhydrase 1 [OS=Homo sapiens]	other metabolic processes	cytosol;other cell component	other molecular function	Pf00194	759	hsa:759; P00915	ENSG00000133742		Gene and protein expression by JAK-STAT signaling after Interleukin-12 stimulation; Reversible hydration of carbon dioxide; Erythrocytes take up carbon dioxide and release oxygen; Erythrocytes take up oxygen and release carbon dioxide
P02790	HPX	1.34738	0.00021354	Not Significant	Hemopexin [OS=Homo sapiens]	protein metabolism;other metabolic processes;transport;other biological processes	non-structural extracellular;other cell component	transporter activity;other molecular function	Pf00045	3263	B2R957; hsa:3263; P02790	ENSG00000110169		Scavenging of heme from plasma
P01597	IGKV1-39	1.34705	0.00308698	Not Significant	Immunoglobulin kappa variable 1-39 [OS=Homo sapiens]	other biological processes	non-structural extracellular;plasma membrane;other membranes;other cell component	other molecular function	Pf07686		A0A0B4J1Z7; A0A0C4DH57; A0A0U1RVJ5; P01597; P01600; P01606; P01612; P04431	ENSG00000242371; ENSG00000282120		Initial triggering of complement; Classical antibody-mediated complement activation; Immunoregulatory interactions between a Lymphoid and a non-Lymphoid cell; Cell surface interactions at the vascular wall; FCGR activation; Regulation of actin dynamics for phagocytic cup formation; Role of phospholipids in phagocytosis; Scavenging of heme from plasma; Role of LAT2/NTAL/LAB on calcium mobilization…
P19823	ITIH2	1.34505	0.00453343	Not Significant	Inter-alpha-trypsin inhibitor heavy chain H2 [OS=Homo sapiens]	other metabolic processes;other biological processes	non-structural extracellular;ER/Golgi	enzyme regulator activity	Pf00092, Pf06668, Pf08487	3698	hsa:3698; P19823; Q14659; Q15484; Q5T986	ENSG00000151655		Regulation of Insulin-like Growth Factor (IGF) transport and uptake by Insulin-like Growth Factor Binding Proteins (IGFBPs); Post-translational protein phosphorylation
P0C0L4	C4A	1.34172	0.00984614	Not Significant	Complement C4-A [OS=Homo sapiens]	stress response;other biological processes	non-structural extracellular;plasma membrane;other membranes;ER/Golgi;other cell component	enzyme regulator activity;other molecular function	Pf00207, Pf01759, Pf01821, Pf01835, Pf07677, Pf07678, Pf07703, Pf17789, Pf17791	720; 721	A6H8M8; A6NHJ5; A7E2V2; B0QZR6; B0V2C8; B2RUT6; B7ZVZ6; hsa:720; hsa:721; P01028; P0C0L4; P78445; Q13160; Q13906; Q14033; Q14835; Q4LE82; Q5JNX2; Q5JQM8; Q6P4R1; Q6U2E5; Q6U2E8; Q6U2F0; Q6U2F3; Q6U2F4; Q6U2F6; Q6U2F8; Q6U2G0; Q96EG2; Q96SA8; Q9NPK5; Q9UIP5	ENSG00000206340; ENSG00000227746; ENSG00000244731	Allograft Rejection; Complement system; Complement system in neuronal development and plasticity; Complement activation; Complement and coagulation cascades; Sudden infant death syndrome (SIDS) susceptibility pathways	Initial triggering of complement; Regulation of Complement cascade; Regulation of Insulin-like Growth Factor (IGF) transport and uptake by Insulin-like Growth Factor Binding Proteins (IGFBPs); Post-translational protein phosphorylation; Activation of C3 and C5
A0A087WW87	IGKV2-40	1.33747	0.0087159	Not Significant	Immunoglobulin kappa variable 2-40 [OS=Homo sapiens]	other biological processes	non-structural extracellular;plasma membrane;other membranes;other cell component		Pf07686		A0A087WW87	ENSG00000273962
P01714	IGLV3-19	1.33558	0.018502	Not Significant	Immunoglobulin lambda variable 3-19 [OS=Homo sapiens]	other biological processes	non-structural extracellular;plasma membrane;other membranes;other cell component	other molecular function	Pf07686		A0A075B6J8; P01714	ENSG00000211663		Initial triggering of complement; Classical antibody-mediated complement activation; Immunoregulatory interactions between a Lymphoid and a non-Lymphoid cell; Cell surface interactions at the vascular wall; FCGR activation; Regulation of actin dynamics for phagocytic cup formation; Role of phospholipids in phagocytosis; Scavenging of heme from plasma; Role of LAT2/NTAL/LAB on calcium mobilization…
P02649	APOE	1.31303	0.0103119	Not Significant	Apolipoprotein E [OS=Homo sapiens]	cell-cell signaling;cell organization and biogenesis;protein metabolism;other metabolic processes;stress response;transport;developmental processes;signal transduction;other biological processes	non-structural extracellular;extracellular matrix;plasma membrane;other membranes;ER/Golgi;other cytoplasmic organelle;other cell component	signal transduction activity or receptor binding;transporter activity;enzyme regulator activity;cytoskeletal activity;other molecular function	Pf01442	348	B2RC15; C0JYY5; hsa:348; P02649; Q9P2S4	ENSG00000130203	Vitamin B12 metabolism; Alzheimer's disease and miRNA effects; Apoptosis-related network due to altered Notch3 in ovarian cancer; ApoE and miR-146 in inflammation and atherosclerosis; Statin inhibition of cholesterol production; Familial hyperlipidemia type 3; Alzheimer's disease	Regulation of Insulin-like Growth Factor (IGF) transport and uptake by Insulin-like Growth Factor Binding Proteins (IGFBPs); Post-translational protein phosphorylation; Retinoid metabolism and transport; Amyloid fiber formation; Scavenging by Class A Receptors; Chylomicron assembly; Chylomicron remodeling; HDL remodeling; Nuclear signaling by ERBB4; NR1H3 & NR1H2 regulate gene expression linked t…
P00738	HP	1.28827	0.0526318	Not Significant	Haptoglobin [OS=Homo sapiens]	protein metabolism;other metabolic processes;stress response;other biological processes	non-structural extracellular;other cell component	other molecular function	Pf00089	3240	B0AZL5; hsa:3240; P00737; P00738; Q0VAC4; Q0VAC5; Q2PP15; Q3B7J0; Q6LBY9; Q9UC67	ENSG00000257017	Network map of SARS-CoV-2 signaling pathway	Scavenging of heme from plasma; Neutrophil degranulation
P00918	CA2	1.28607	0.00902209	Not Significant	Carbonic anhydrase 2 [OS=Homo sapiens]	other metabolic processes;stress response;transport;developmental processes;signal transduction;other biological processes	plasma membrane;other membranes;cytosol;other cell component	other molecular function	Pf00194	760	B2R7G8; hsa:760; P00918; Q6FI12; Q96ET9	ENSG00000104267	Proximal tubule transport	Reversible hydration of carbon dioxide; Erythrocytes take up carbon dioxide and release oxygen; Erythrocytes take up oxygen and release carbon dioxide
P04003	C4BPA	1.28293	0.00851183	Not Significant	C4b-binding protein alpha chain [OS=Homo sapiens]	stress response;other biological processes	non-structural extracellular;plasma membrane;other membranes		Pf00084, Pf18453	722	hsa:722; P04003; Q5VVQ8	ENSG00000123838	Complement system; Complement system in neuronal development and plasticity	Regulation of Complement cascade
P00751	CFB	1.27972	0.0232765	Not Significant	Complement factor B [OS=Homo sapiens]	protein metabolism;stress response	non-structural extracellular;plasma membrane;other membranes	other molecular function	Pf00084, Pf00089, Pf00092	629	B0QZQ6; hsa:629; O15006; P00751; Q29944; Q53F89; Q5JP67; Q5ST50; Q96HX6; Q9BTF5; Q9BX92	ENSG00000239754; ENSG00000241253; ENSG00000241534; ENSG00000242335; ENSG00000243570; ENSG00000243649	Complement system; Complement system in neuronal development and plasticity; Acquired partial lipodystrophy / Barraquer-Simons syndrome; Network map of SARS-CoV-2 signaling pathway; Complement activation; Complement and coagulation cascades	Regulation of Complement cascade; Alternative complement activation; Activation of C3 and C5
P00736	C1R	1.2721	0.00823294	Not Significant	Complement C1r subcomponent [OS=Homo sapiens]	protein metabolism;other metabolic processes;stress response;other biological processes	non-structural extracellular	other molecular function	Pf00084, Pf00089, Pf00431, Pf14670	715	A6NJQ8; hsa:715; P00736; Q68D77; Q8J012		Complement system in neuronal development and plasticity; Complement and coagulation cascades	Initial triggering of complement; Classical antibody-mediated complement activation; Regulation of Complement cascade
Q8N6C8	LILRA3	1.2711	0.0976413	Not Significant	Leukocyte immunoglobulin-like receptor subfamily A member 3 [OS=Homo sapiens]	other biological processes	non-structural extracellular;plasma membrane;other membranes		Pf00047, Pf13895	11026	hsa:11026; J3KPM2; O15469; O15470; O75016; Q8N151; Q8N154; Q8N6C8; Q8NHJ1; Q8NHJ2; Q8NHJ3; Q8NHJ4	ENSG00000273884; ENSG00000275841; ENSG00000276175; ENSG00000278046		Immunoregulatory interactions between a Lymphoid and a non-Lymphoid cell; Neutrophil degranulation
A0A0C4DH38	IGHV5-51	1.26595	0.00588647	Not Significant	Immunoglobulin heavy variable 5-51 [OS=Homo sapiens]	cell organization and biogenesis;stress response;transport;signal transduction;other biological processes	non-structural extracellular;plasma membrane;other membranes	signal transduction activity or receptor binding;other molecular function	Pf07686		A0A0C4DH38; A0A0G2JP91	ENSG00000211966; ENSG00000277574
P04211	IGLV7-43	1.26339	0.00412863	Not Significant	Immunoglobulin lambda variable 7-43 [OS=Homo sapiens]	other biological processes	non-structural extracellular;plasma membrane;other membranes;other cell component	other molecular function	Pf07686		A0A0B4J1U2; P04211	ENSG00000211652; ENSG00000278293		Initial triggering of complement; Classical antibody-mediated complement activation; Immunoregulatory interactions between a Lymphoid and a non-Lymphoid cell; Cell surface interactions at the vascular wall; FCGR activation; Regulation of actin dynamics for phagocytic cup formation; Role of phospholipids in phagocytosis; Scavenging of heme from plasma; Role of LAT2/NTAL/LAB on calcium mobilization…
P55056	APOC4	1.24745	0.0488649	Not Significant	Apolipoprotein C-IV [OS=Homo sapiens]	other metabolic processes;transport;other biological processes	non-structural extracellular	transporter activity	Pf15119	346	B3KWY6; hsa:346; P55056; Q53YY8	ENSG00000267467		NR1H3 & NR1H2 regulate gene expression linked to cholesterol transport and efflux; VLDL assembly; VLDL clearance
P30041	PRDX6	1.23912	0.148266	Not Significant	Peroxiredoxin-6 [OS=Homo sapiens]	other metabolic processes;stress response;other biological processes	non-structural extracellular;cytosol;mitochondrion;nucleus;other cytoplasmic organelle;other cell component	other molecular function	Pf00578, Pf10417	9588	A8JZY7; hsa:9588; P30041; P32077; Q5TAH4; Q5ZEZ8	ENSG00000117592	Nuclear receptors meta-pathway; NRF2 pathway; VEGFA-VEGFR2 signaling pathway	Neutrophil degranulation; Detoxification of Reactive Oxygen Species
P0DOY2	IGLC2	1.2332	0.0418778	Not Significant	Immunoglobulin lambda constant 2 [OS=Homo sapiens]	cell organization and biogenesis;stress response;transport;signal transduction;other biological processes	non-structural extracellular;plasma membrane;other membranes	signal transduction activity or receptor binding;other molecular function	Pf07654		A0A075B6K9; A0M8Q4; P0CG05; P0CG06; P0DOY2; P80423	ENSG00000211677		Initial triggering of complement; Classical antibody-mediated complement activation; Immunoregulatory interactions between a Lymphoid and a non-Lymphoid cell; Cell surface interactions at the vascular wall; FCGR activation; Regulation of actin dynamics for phagocytic cup formation; Role of phospholipids in phagocytosis; Scavenging of heme from plasma; Role of LAT2/NTAL/LAB on calcium mobilization…
P0DOY3	IGLC3	1.2332	0.0418778	Not Significant	Immunoglobulin lambda constant 3 [OS=Homo sapiens]	cell organization and biogenesis;stress response;transport;signal transduction;other biological processes	non-structural extracellular;plasma membrane;other membranes	signal transduction activity or receptor binding;other molecular function	Pf07654		A0A075B6L0; A0M8Q4; P0CG05; P0CG06; P0DOY3; P80423	ENSG00000211679		Initial triggering of complement; Classical antibody-mediated complement activation; Immunoregulatory interactions between a Lymphoid and a non-Lymphoid cell; Cell surface interactions at the vascular wall; FCGR activation; Regulation of actin dynamics for phagocytic cup formation; Role of phospholipids in phagocytosis; Scavenging of heme from plasma; Role of LAT2/NTAL/LAB on calcium mobilization…
P00734	F2	1.23272	0.00653811	Not Significant	Prothrombin [OS=Homo sapiens]	protein metabolism;stress response;developmental processes;signal transduction;other biological processes	non-structural extracellular;extracellular matrix;plasma membrane;other membranes;ER/Golgi	signal transduction activity or receptor binding;other molecular function	Pf00051, Pf00089, Pf00594, Pf09396	2147	B2R7F7; B4E1A7; hsa:2147; P00734; Q4QZ40; Q53H04; Q53H06; Q69EZ7; Q7Z7P3; Q9UCA1	ENSG00000180210	Selenium micronutrient network; Vitamin B12 metabolism; Folate metabolism; Blood clotting cascade; IL1 and megakaryocytes in obesity; Regulation of actin cytoskeleton; Complement and coagulation cascades	Cell surface interactions at the vascular wall; Regulation of Complement cascade; Regulation of Insulin-like Growth Factor (IGF) transport and uptake by Insulin-like Growth Factor Binding Proteins (IGFBPs); Common Pathway of Fibrin Clot Formation; G alpha (q) signalling events; Peptide ligand-binding receptors; Thrombin signalling through proteinase activated receptors (PARs); Intrinsic Pathway o…
P06396	GSN	1.23263	0.0498714	Not Significant	Gelsolin [OS=Homo sapiens]	cell organization and biogenesis;protein metabolism;other metabolic processes;transport;developmental processes;other biological processes	non-structural extracellular;plasma membrane;other membranes;cytosol;cytoskeleton;other cell component	cytoskeletal activity;other molecular function	Pf00626	2934	A2A418; A8MUD1; A8MYN7; B7Z373; B7Z5V1; F5H1A8; hsa:2934; P06396; Q5T0I2; Q8WVV7	ENSG00000148180	Ebola virus pathway in host; Regulation of actin cytoskeleton; Senescence and autophagy in cancer	Neutrophil degranulation; Amyloid fiber formation; Sensory processing of sound by outer hair cells of the cochlea; Caspase-mediated cleavage of cytoskeletal proteins
P01619	IGKV3-20	1.22956	0.0299811	Not Significant	Immunoglobulin kappa variable 3-20 [OS=Homo sapiens]	stress response;other biological processes	non-structural extracellular;plasma membrane;other membranes	other molecular function	Pf07686		A0A0B4J1Z6; P01619; P01620; P01621; P01622; P01623; P04206; P06311; P18135; P18136	ENSG00000239951; ENSG00000282402		Initial triggering of complement; Classical antibody-mediated complement activation; Immunoregulatory interactions between a Lymphoid and a non-Lymphoid cell; Cell surface interactions at the vascular wall; FCGR activation; Regulation of actin dynamics for phagocytic cup formation; Role of phospholipids in phagocytosis; Scavenging of heme from plasma; Role of LAT2/NTAL/LAB on calcium mobilization…
P06733	ENO1	1.22099	0.0245049	Not Significant	Alpha-enolase [OS=Homo sapiens]	other metabolic processes;other biological processes	plasma membrane;other membranes;cytosol;cytoskeleton;other cell component	nucleic acid binding activity;other molecular function	Pf00113, Pf03952	2023	B2RD59; hsa:2023; P06733; P22712; Q16704; Q4TUS4; Q53FT9; Q53HR3; Q658M5; Q6GMP2; Q71V37; Q7Z3V6; Q8WU71; Q96GV1; Q9BT62; Q9UCH6; Q9UM55	ENSG00000074800	Clear cell renal cell carcinoma pathways; Metabolic reprogramming in colon cancer; Aerobic glycolysis; IL-18 signaling pathway; Glycolysis and gluconeogenesis	Glycolysis; Gluconeogenesis; Manipulation of host energy metabolism
A0A0C4DH67	IGKV1-8	1.21784	0.0286178	Not Significant	Immunoglobulin kappa variable 1-8 [OS=Homo sapiens]	other biological processes	non-structural extracellular;plasma membrane;other membranes;other cell component		Pf07686		A0A0C4DH67	ENSG00000240671; ENSG00000283113
P01780	IGHV3-7	1.21689	0.0479053	Not Significant	Immunoglobulin heavy variable 3-7 [OS=Homo sapiens]	cell organization and biogenesis;stress response;transport;signal transduction;other biological processes	non-structural extracellular;plasma membrane;other membranes	signal transduction activity or receptor binding;other molecular function	Pf07686		A0A0B4J1U8; P01780; P01781; P80419	ENSG00000211938; ENSG00000282211		Initial triggering of complement; Classical antibody-mediated complement activation; Immunoregulatory interactions between a Lymphoid and a non-Lymphoid cell; Cell surface interactions at the vascular wall; FCGR activation; Regulation of actin dynamics for phagocytic cup formation; Role of phospholipids in phagocytosis; Scavenging of heme from plasma; Role of LAT2/NTAL/LAB on calcium mobilization…
A0A0C4DH34	IGHV4-28	1.21619	0.0327568	Not Significant	Immunoglobulin heavy variable 4-28 [OS=Homo sapiens]	cell organization and biogenesis;stress response;transport;signal transduction;other biological processes	non-structural extracellular;plasma membrane;other membranes	signal transduction activity or receptor binding;other molecular function	Pf07686		A0A0C4DH34	ENSG00000211952; ENSG00000282726
P02748	C9	1.21501	0.0273514	Not Significant	Complement component C9 [OS=Homo sapiens]	cell organization and biogenesis;stress response;other biological processes	non-structural extracellular;plasma membrane;other membranes		Pf00057, Pf00090, Pf01823	735	hsa:735; P02748	ENSG00000113600	Allograft Rejection; Complement system; Complement system in neuronal development and plasticity; Complement activation; Complement and coagulation cascades	Regulation of Complement cascade; Terminal pathway of complement
P01876	IGHA1	1.21492	0.0866155	Not Significant	Immunoglobulin heavy constant alpha 1 [OS=Homo sapiens]	cell organization and biogenesis;protein metabolism;other metabolic processes;stress response;transport;signal transduction;other biological processes	non-structural extracellular;plasma membrane;other membranes	other molecular function	Pf07654		P01876	ENSG00000211895; ENSG00000282633	Inflammatory response pathway	Cell surface interactions at the vascular wall; Scavenging of heme from plasma
P19827	ITIH1	1.21135	0.0313249	Not Significant	Inter-alpha-trypsin inhibitor heavy chain H1 [OS=Homo sapiens]	other metabolic processes;other biological processes	non-structural extracellular	enzyme regulator activity;other molecular function	Pf00092, Pf06668, Pf08487	3697	A8K9N5; B2RAH9; B7Z558; B7Z8C0; F5H165; F5H7Y8; hsa:3697; P19827; P78455; Q01746; Q562G1	ENSG00000055957
A0A0J9YX35	IGHV3-64D	1.20756	0.141429	Not Significant	Immunoglobulin heavy variable 3-64D [OS=Homo sapiens]	cell organization and biogenesis;stress response;transport;signal transduction;other biological processes	non-structural extracellular;plasma membrane;other membranes	signal transduction activity or receptor binding;other molecular function	Pf07686		A0A0J9YX35	ENSG00000282639
P04275	VWF	1.2075	0.0675819	Not Significant	von Willebrand factor [OS=Homo sapiens]	cell adhesion;stress response;other biological processes	non-structural extracellular;extracellular matrix;ER/Golgi;other cell component	signal transduction activity or receptor binding;other molecular function	Pf00092, Pf00093, Pf00094, Pf01826, Pf08742, Pf16164	7450	hsa:7450; P04275; Q8TCE8; Q99806	ENSG00000110799	Blood clotting cascade; Focal adhesion; Focal adhesion: PI3K-Akt-mTOR-signaling pathway; PI3K-Akt signaling pathway; 22q11.2 copy number variation syndrome; Complement and coagulation cascades	Platelet degranulation ; Intrinsic Pathway of Fibrin Clot Formation; Defective F8 cleavage by thrombin; Integrin cell surface interactions; Signaling by BRAF and RAF1 fusions; Signaling by moderate kinase activity BRAF mutants; Paradoxical activation of RAF signaling by kinase inactive BRAF; Signaling downstream of RAS mutants; Signaling by RAF1 mutants; MAP2K and MAPK activation; Signaling by hi…
P02768	ALB	1.20516	0.104612	Not Significant	Albumin [OS=Homo sapiens]	stress response;other biological processes	non-structural extracellular;ER/Golgi;other cell component	nucleic acid binding activity;other molecular function	Pf00273	213	E7ESS9; hsa:213; O95574; P02768; P04277; Q13140; Q645G4; Q68DN5; Q6UXK4; Q86YG0; Q8IUK7; Q9P157; Q9P1I7; Q9UHS3; Q9UJZ0	ENSG00000163631	Selenium micronutrient network; Vitamin B12 metabolism; Folate metabolism; Complement system; VEGFA-VEGFR2 signaling pathway	Scavenging of heme from plasma; Regulation of Insulin-like Growth Factor (IGF) transport and uptake by Insulin-like Growth Factor Binding Proteins (IGFBPs); Post-translational protein phosphorylation; Platelet degranulation ; HDL remodeling; Cytoprotection by HMOX1; Recycling of bile acids and salts; Heme degradation; Heme biosynthesis
P05546	SERPIND1	1.20493	0.0590197	Not Significant	Heparin cofactor 2 [OS=Homo sapiens]	stress response;other biological processes	non-structural extracellular;ER/Golgi	enzyme regulator activity;other molecular function	Pf00079	3053	B2RAI1; D3DX34; hsa:3053; P05546; Q6IBZ5	ENSG00000099937	22q11.2 copy number variation syndrome; Complement and coagulation cascades	Regulation of Insulin-like Growth Factor (IGF) transport and uptake by Insulin-like Growth Factor Binding Proteins (IGFBPs); Post-translational protein phosphorylation; Common Pathway of Fibrin Clot Formation; Intrinsic Pathway of Fibrin Clot Formation
P00740	F9	1.20052	0.0059615	Not Significant	Coagulation factor IX [OS=Homo sapiens]	protein metabolism;other metabolic processes;stress response	non-structural extracellular;plasma membrane;other membranes;ER/Golgi	other molecular function	Pf00008, Pf00089, Pf00594, Pf14670	2158	A8K9N4; F2RM36; hsa:2158; P00740; Q5FBE1; Q5JYJ8	ENSG00000101981	Blood clotting cascade; Complement and coagulation cascades	Intrinsic Pathway of Fibrin Clot Formation; Gamma-carboxylation of protein precursors; Transport of gamma-carboxylated protein precursors from the endoplasmic reticulum to the Golgi apparatus; Removal of aminoterminal propeptides from gamma-carboxylated proteins; Defective factor IX causes thrombophilia; Defective cofactor function of FVIIIa variant; Defective F9 variant does not activate FX; Ext…
A0A075B6R9	IGKV2D-24	1.19984	0.128361	Not Significant	Probable non-functional immunoglobulin kappa variable 2D-24 [OS=Homo sapiens]	other biological processes	non-structural extracellular;plasma membrane;other membranes;other cell component		Pf07686		A0A075B6R9	ENSG00000241566
A0A0C4DH68	IGKV2-24	1.19984	0.128361	Not Significant	Immunoglobulin kappa variable 2-24 [OS=Homo sapiens]	other biological processes	non-structural extracellular;plasma membrane;other membranes;other cell component		Pf07686		A0A0C4DH68	ENSG00000241294; ENSG00000282671
P08603	CFH	1.19817	0.0954865	Not Significant	Complement factor H [OS=Homo sapiens]	stress response;other biological processes	non-structural extracellular	other molecular function	Pf00084	3075	A5PL14; hsa:3075; P08603; P78435; Q14570; Q2TAZ5; Q38G77; Q5TFM3; Q8N708; Q9NU86	ENSG00000000971	Complement system; Complement system in neuronal development and plasticity; Network map of SARS-CoV-2 signaling pathway; Complement and coagulation cascades	Regulation of Complement cascade
P02745	C1QA	1.19312	0.0742904	Not Significant	Complement C1q subcomponent subunit A [OS=Homo sapiens]	cell-cell signaling;cell organization and biogenesis;stress response;developmental processes;other biological processes	non-structural extracellular;other cell component	other molecular function	Pf00386, Pf01391	712	B2R4X2; hsa:712; P02745; Q5T963	ENSG00000173372	Allograft Rejection; Microglia pathogen phagocytosis pathway; Oxidative damage response; Complement system in neuronal development and plasticity; Complement activation; Complement and coagulation cascades	Initial triggering of complement; Classical antibody-mediated complement activation; Regulation of Complement cascade
P02766	TTR	1.19024	0.0301575	Not Significant	Transthyretin [OS=Homo sapiens]	other metabolic processes;transport;signal transduction	non-structural extracellular;other cytoplasmic organelle	signal transduction activity or receptor binding;other molecular function	Pf00576	7276	hsa:7276; P02766; Q549C7; Q6IB96; Q9UBZ6; Q9UCM9	ENSG00000118271		Retinoid metabolism and transport; Neutrophil degranulation; Amyloid fiber formation; The canonical retinoid cycle in rods (twilight vision); Retinoid cycle disease events; Non-integrin membrane-ECM interactions
P01024	C3	1.17811	0.165683	Not Significant	Complement C3 [OS=Homo sapiens]	cell-cell signaling;cell organization and biogenesis;other metabolic processes;stress response;developmental processes;signal transduction;other biological processes	non-structural extracellular;plasma membrane;other membranes;ER/Golgi;other cytoplasmic organelle;other cell component	signal transduction activity or receptor binding;enzyme regulator activity	Pf00207, Pf01759, Pf01821, Pf01835, Pf07677, Pf07678, Pf07703, Pf17789, Pf17790, Pf17791	718	A7E236; hsa:718; P01024	ENSG00000125730	Allograft Rejection; Complement system; TYROBP causal network in microglia; Cells and molecules involved in local acute inflammatory response ; 16p11.2 distal deletion syndrome; Complement system in neuronal development and plasticity; Acquired partial lipodystrophy / Barraquer-Simons syndrome; Complement activation; Complement and coagulation cascades	Immunoregulatory interactions between a Lymphoid and a non-Lymphoid cell; Regulation of Complement cascade; Regulation of Insulin-like Growth Factor (IGF) transport and uptake by Insulin-like Growth Factor Binding Proteins (IGFBPs); Post-translational protein phosphorylation; Neutrophil degranulation; Peptide ligand-binding receptors; Alternative complement activation; Activation of C3 and C5; G …
A0A075B6K4	IGLV3-10	1.17794	0.133732	Not Significant	Immunoglobulin lambda variable 3-10 [OS=Homo sapiens]	other biological processes	non-structural extracellular;plasma membrane;other membranes;other cell component		Pf07686		A0A075B6K4	ENSG00000211669
A0A0B4J1X5	IGHV3-74	1.17604	0.0791244	Not Significant	Immunoglobulin heavy variable 3-74 [OS=Homo sapiens]	cell organization and biogenesis;stress response;transport;signal transduction;other biological processes	non-structural extracellular;plasma membrane;other membranes	signal transduction activity or receptor binding;other molecular function	Pf07686		A0A0B4J1X5	ENSG00000224650; ENSG00000282305
P15169	CPN1	1.17076	0.0259939	Not Significant	Carboxypeptidase N catalytic chain [OS=Homo sapiens]	protein metabolism;other metabolic processes;other biological processes	non-structural extracellular	other molecular function	Pf00246, Pf13620	1369	B1AP59; hsa:1369; P15169	ENSG00000120054	Complement system; Steroid biosynthesis; RAS and bradykinin pathways in COVID-19; Kinin-Kallikrein pathway	Regulation of Complement cascade
P0C0L5	C4B; C4B_2	1.17055	0.109155	Not Significant	Complement C4-B [OS=Homo sapiens]	stress response;other biological processes	non-structural extracellular;plasma membrane;other membranes;other cell component	enzyme regulator activity;other molecular function	Pf00207, Pf01759, Pf01821, Pf01835, Pf07677, Pf07678, Pf07703, Pf17789, Pf17791	100293534; 721	A2BHY4; hsa:100293534; hsa:721; P01028; P0C0L5; P78445; Q13160; Q13906; Q14033; Q14835; Q6U2E9; Q6U2G1; Q6U2I5; Q6U2L1; Q6U2L7; Q6U2L9; Q6U2M5; Q6VCV8; Q96SA7; Q9NPK5; Q9UIP5	ENSG00000224389; ENSG00000228267; ENSG00000228454; ENSG00000233312; ENSG00000236625	Allograft Rejection; Oxidative damage response; Complement system in neuronal development and plasticity; Complement activation; Complement and coagulation cascades; Sudden infant death syndrome (SIDS) susceptibility pathways	Initial triggering of complement; Regulation of Complement cascade; Activation of C3 and C5
A0A075B6I0	IGLV8-61	1.16864	0.280384	Not Significant	Immunoglobulin lambda variable 8-61 [OS=Homo sapiens]	other biological processes	non-structural extracellular;plasma membrane;other membranes;other cell component		Pf07686		A0A075B6I0	ENSG00000211638
P02747	C1QC	1.16257	0.212553	Not Significant	Complement C1q subcomponent subunit C [OS=Homo sapiens]	cell organization and biogenesis;stress response;other biological processes	non-structural extracellular;other cell component		Pf00386, Pf01391	714	hsa:714; P02747; Q7Z502; Q96DL2; Q96H05	ENSG00000159189	Allograft Rejection; Microglia pathogen phagocytosis pathway; Oxidative damage response; TYROBP causal network in microglia; Complement system in neuronal development and plasticity; Complement activation; Complement and coagulation cascades	Initial triggering of complement; Classical antibody-mediated complement activation; Regulation of Complement cascade
P01624	IGKV3-15	1.15864	0.0474175	Not Significant	Immunoglobulin kappa variable 3-15 [OS=Homo sapiens]	other biological processes	non-structural extracellular;plasma membrane;other membranes;other cell component	other molecular function	Pf07686		A0A0B4J1T9; P01624; P04207	ENSG00000244437; ENSG00000282447		Initial triggering of complement; Classical antibody-mediated complement activation; Immunoregulatory interactions between a Lymphoid and a non-Lymphoid cell; Cell surface interactions at the vascular wall; FCGR activation; Regulation of actin dynamics for phagocytic cup formation; Role of phospholipids in phagocytosis; Scavenging of heme from plasma; Role of LAT2/NTAL/LAB on calcium mobilization…
P13671	C6	1.15256	0.132953	Not Significant	Complement component C6 [OS=Homo sapiens]	stress response;developmental processes;other biological processes	non-structural extracellular;plasma membrane;other membranes		Pf00057, Pf00084, Pf00090, Pf01823	729	hsa:729; P13671	ENSG00000039537	Allograft Rejection; Complement system; Cells and molecules involved in local acute inflammatory response ; Complement system in neuronal development and plasticity; Complement activation; Complement and coagulation cascades	Regulation of Complement cascade; Terminal pathway of complement
Q08380	LGALS3BP	1.15184	0.0508186	Not Significant	Galectin-3-binding protein [OS=Homo sapiens]	cell adhesion;stress response;transport;signal transduction	non-structural extracellular;other membranes;other cell component	other molecular function	Pf00530, Pf07707	3959	hsa:3959; Q08380; Q7M4S0; Q9UCH8; Q9UCH9; Q9UCI0	ENSG00000108679	Network map of SARS-CoV-2 signaling pathway	Platelet degranulation
P05155	SERPING1	1.14966	0.145149	Not Significant	Plasma protease C1 inhibitor [OS=Homo sapiens]	stress response;other biological processes	non-structural extracellular;ER/Golgi;other cell component	enzyme regulator activity	Pf00079	710	A6NMU0; A8KAI9; B2R6L5; B4E1F0; B4E1H2; hsa:710; P05155; Q16304; Q547W3; Q59EI5; Q7Z455; Q96FE0; Q9UC49; Q9UCF9	ENSG00000149131	Complement system; RAS and bradykinin pathways in COVID-19; Kinin-Kallikrein pathway; Complement system in neuronal development and plasticity; Complement and coagulation cascades	Regulation of Complement cascade; Platelet degranulation ; Intrinsic Pathway of Fibrin Clot Formation; Defective SERPING1 causes hereditary angioedema
P01859	IGHG2	1.14433	0.24806	Not Significant	Immunoglobulin heavy constant gamma 2 [OS=Homo sapiens]	cell organization and biogenesis;stress response;transport;signal transduction;other biological processes	non-structural extracellular;plasma membrane;other membranes	signal transduction activity or receptor binding;other molecular function	Pf07654		A6NE66; P01859	ENSG00000211893; ENSG00000274497		Initial triggering of complement; Classical antibody-mediated complement activation; FCGR activation; Regulation of actin dynamics for phagocytic cup formation; Role of phospholipids in phagocytosis; FCGR3A-mediated IL10 synthesis; FCGR3A-mediated phagocytosis; Regulation of Complement cascade
P02746	C1QB	1.14185	0.182864	Not Significant	Complement C1q subcomponent subunit B [OS=Homo sapiens]	cell organization and biogenesis;stress response;other biological processes	non-structural extracellular;other cell component		Pf00386, Pf01391	713	hsa:713; P02746; Q5T959; Q96H17		Allograft Rejection; Complement system in neuronal development and plasticity; Complement activation; Complement and coagulation cascades	Initial triggering of complement; Classical antibody-mediated complement activation; Regulation of Complement cascade
P04114	APOB	1.14162	0.281195	Not Significant	Apolipoprotein B-100 [OS=Homo sapiens]	cell organization and biogenesis;protein metabolism;other metabolic processes;transport;developmental processes;other biological processes	non-structural extracellular;plasma membrane;other membranes;cytosol;ER/Golgi;other cytoplasmic organelle;other cell component	signal transduction activity or receptor binding;transporter activity;other molecular function	Pf01347, Pf06448, Pf09172, Pf12491	338	hsa:338; O00502; P04114; P78479; P78480; P78481; Q13779; Q13785; Q13786; Q13787; Q13788; Q4ZG63; Q53QC8; Q7Z600; Q9UMN0	ENSG00000084674	Selenium micronutrient network; Vitamin B12 metabolism; Folate metabolism; Statin inhibition of cholesterol production; Male infertility; Familial hyperlipidemia type 2	Cell surface interactions at the vascular wall; Regulation of Insulin-like Growth Factor (IGF) transport and uptake by Insulin-like Growth Factor Binding Proteins (IGFBPs); Post-translational protein phosphorylation; Retinoid metabolism and transport; Scavenging by Class B Receptors; Heme signaling; Scavenging by Class A Receptors; Chylomicron assembly; Chylomicron remodeling; Chylomicron clearan…
A0A087WSX0	IGLV5-45	1.13396	0.25604	Not Significant	Immunoglobulin lambda variable 5-45 [OS=Homo sapiens]	other biological processes	non-structural extracellular;plasma membrane;other membranes;other cell component		Pf07686		A0A087WSX0	ENSG00000211650
P01701	IGLV1-51	1.13336	0.217262	Not Significant	Immunoglobulin lambda variable 1-51 [OS=Homo sapiens]	other biological processes	non-structural extracellular;plasma membrane;other membranes;other cell component	other molecular function	Pf07686		A0A075B6I5; P01701; P01702; P06316; P06888	ENSG00000211644		Initial triggering of complement; Classical antibody-mediated complement activation; Immunoregulatory interactions between a Lymphoid and a non-Lymphoid cell; Cell surface interactions at the vascular wall; FCGR activation; Regulation of actin dynamics for phagocytic cup formation; Role of phospholipids in phagocytosis; Scavenging of heme from plasma; Role of LAT2/NTAL/LAB on calcium mobilization…
P00747	PLG	1.1323	0.267987	Not Significant	Plasminogen [OS=Homo sapiens]	cell organization and biogenesis;protein metabolism;stress response;other biological processes	non-structural extracellular;plasma membrane;other membranes;other cell component	signal transduction activity or receptor binding;other molecular function	Pf00024, Pf00051, Pf00089	5340	hsa:5340; P00747; Q15146; Q5TEH4; Q6PA00	ENSG00000122194	Selenium micronutrient network; Vitamin B12 metabolism; Folate metabolism; Blood clotting cascade; Complement system; Fibrin complement receptor 3 signaling pathway; Complement and coagulation cascades	Regulation of Insulin-like Growth Factor (IGF) transport and uptake by Insulin-like Growth Factor Binding Proteins (IGFBPs); Platelet degranulation ; Signaling by PDGF; Activation of Matrix Metalloproteinases; Dissolution of Fibrin Clot
P32119	PRDX2	1.12952	0.235465	Not Significant	Peroxiredoxin-2 [OS=Homo sapiens]	cell cycle OR cell proliferation;other metabolic processes;stress response;developmental processes;other biological processes	cytosol;other cell component	other molecular function	Pf00578, Pf10417	7001	A8K0C0; hsa:7001; P31945; P32118; P32119; P35701; Q6FHG4; Q92763; Q9UC23	ENSG00000167815	Selenium micronutrient network; VEGFA-VEGFR2 signaling pathway	Detoxification of Reactive Oxygen Species; TP53 Regulates Metabolic Genes; Deregulated CDK5 triggers multiple neurodegenerative pathways in Alzheimer's disease models
P69891	HBG1	1.12837	0.310514	Not Significant	Hemoglobin subunit gamma-1 [OS=Homo sapiens]	other metabolic processes;transport;other biological processes	cytosol;other cell component	other molecular function	Pf00042	3047	hsa:3047; P02096; P62027; P69891; Q549G1; Q8TDA1; Q96FH7	ENSG00000213934		Factors involved in megakaryocyte development and platelet production
P0DOX2		1.12537	0.132719	Not Significant	Immunoglobulin alpha-2 heavy chain [OS=Homo sapiens]	other biological processes	non-structural extracellular;plasma membrane;other membranes;other cell component		Pf00047, Pf07654, Pf07686
P02749	APOH	1.12512	0.27334	Not Significant	Beta-2-glycoprotein 1 [OS=Homo sapiens]	protein metabolism;other metabolic processes;stress response;transport;other biological processes	non-structural extracellular;other cell component	enzyme regulator activity;other molecular function	Pf00084, Pf09014	350	B2R9M3; hsa:350; P02749; Q9UCN7	ENSG00000091583		Platelet degranulation
P55058	PLTP	1.11807	0.0930396	Not Significant	Phospholipid transfer protein [OS=Homo sapiens]	cell organization and biogenesis;other metabolic processes;transport;other biological processes	non-structural extracellular;nucleus	transporter activity;other molecular function	Pf01273, Pf02886	5360	A8K006; B4DDD5; B4DRB4; E1P5N8; E7EV16; hsa:5360; P55058; Q8WTT1; Q9BR07; Q9BSH8	ENSG00000100979	PPAR-alpha pathway; Nuclear receptors meta-pathway; PPAR signaling pathway; Statin inhibition of cholesterol production; Familial hyperlipidemia type 1; Familial hyperlipidemia type 2; Familial hyperlipidemia type 3; Familial hyperlipidemia type 4; Familial hyperlipidemia type 5
P23083	IGHV1-2	1.11374	0.22747	Not Significant	Immunoglobulin heavy variable 1-2 [OS=Homo sapiens]	cell organization and biogenesis;stress response;transport;signal transduction;other biological processes	non-structural extracellular;plasma membrane;other membranes	signal transduction activity or receptor binding;other molecular function	Pf07686		A0A087WSX2; P01744; P23083	ENSG00000211934; ENSG00000282550		Initial triggering of complement; Classical antibody-mediated complement activation; Immunoregulatory interactions between a Lymphoid and a non-Lymphoid cell; Cell surface interactions at the vascular wall; FCGR activation; Regulation of actin dynamics for phagocytic cup formation; Role of phospholipids in phagocytosis; Scavenging of heme from plasma; Role of LAT2/NTAL/LAB on calcium mobilization…
P18428	LBP	1.11346	0.29423	Not Significant	Lipopolysaccharide-binding protein [OS=Homo sapiens]	stress response;transport;signal transduction;other biological processes	non-structural extracellular;other membranes;other cell component	signal transduction activity or receptor binding;other molecular function	Pf01273, Pf02886	3929	B2R938; hsa:3929; O43438; P18428; Q92672; Q9H403; Q9UD66	ENSG00000129988	Regulation of toll-like receptor signaling pathway; Fibrin complement receptor 3 signaling pathway; Pathogenesis of SARS-CoV-2 mediated by nsp9-nsp10 complex; Network map of SARS-CoV-2 signaling pathway; Toll-like receptor signaling pathway	Interleukin-4 and Interleukin-13 signaling; Regulation of TLR by endogenous ligand; Transfer of LPS from LBP carrier to CD14
P01817	IGHV2-5	1.1091	0.282555	Not Significant	Immunoglobulin heavy variable 2-5 [OS=Homo sapiens]	cell organization and biogenesis;stress response;transport;signal transduction;other biological processes	non-structural extracellular;plasma membrane;other membranes	signal transduction activity or receptor binding;other molecular function	Pf07686		A0A0A0MS10; P01817; P01818	ENSG00000211937; ENSG00000277318		Initial triggering of complement; Classical antibody-mediated complement activation; Immunoregulatory interactions between a Lymphoid and a non-Lymphoid cell; Cell surface interactions at the vascular wall; FCGR activation; Regulation of actin dynamics for phagocytic cup formation; Role of phospholipids in phagocytosis; Scavenging of heme from plasma; Role of LAT2/NTAL/LAB on calcium mobilization…
P01871	IGHM	1.10816	0.379876	Not Significant	Immunoglobulin heavy constant mu [OS=Homo sapiens]	cell organization and biogenesis;stress response;transport;signal transduction;other biological processes	non-structural extracellular;plasma membrane;other membranes;other cell component	other molecular function	Pf07654		A0A075B6N9; A0A0G2JQL4; P01871; P04220; P20769	ENSG00000211899; ENSG00000282657		Cell surface interactions at the vascular wall; CD22 mediated BCR regulation; Antigen activates B Cell Receptor (BCR) leading to generation of second messengers
P01031	C5	1.10677	0.353643	Not Significant	Complement C5 [OS=Homo sapiens]	stress response;developmental processes;signal transduction;other biological processes	non-structural extracellular;plasma membrane;other membranes	signal transduction activity or receptor binding;enzyme regulator activity	Pf00207, Pf01759, Pf01821, Pf01835, Pf07677, Pf07678, Pf07703, Pf17789, Pf17790, Pf17791	727	hsa:727; P01031; Q14CJ0; Q27I61	ENSG00000106804	Allograft Rejection; Spinal cord injury; Complement system; Oxidative damage response; Cells and molecules involved in local acute inflammatory response ; Complement system in neuronal development and plasticity; Acquired partial lipodystrophy / Barraquer-Simons syndrome; Complement activation	Regulation of Complement cascade; Peptide ligand-binding receptors; Activation of C3 and C5; G alpha (i) signalling events; Terminal pathway of complement
O75636	FCN3	1.09905	0.231057	Not Significant	Ficolin-3 [OS=Homo sapiens]	stress response;transport;other biological processes	non-structural extracellular;extracellular matrix;other cell component	other molecular function	Pf00147	8547	hsa:8547; O75636; Q6IBJ5; Q8WW86	ENSG00000142748	Complement system in neuronal development and plasticity	Initial triggering of complement; Ficolins bind to repetitive carbohydrate structures on the target cell surface
P22792	CPN2	1.09721	0.267884	Not Significant	Carboxypeptidase N subunit 2 [OS=Homo sapiens]	other biological processes	non-structural extracellular;extracellular matrix	enzyme regulator activity	Pf13855	1370	B2RPE7; hsa:1370; P22792; Q86SU4; Q8N5V4	ENSG00000178772		Regulation of Complement cascade
A0A075B6R2	IGHV4-4	1.07774	0.525699	Not Significant	Immunoglobulin heavy variable 4-4 [OS=Homo sapiens]	cell organization and biogenesis;stress response;transport;signal transduction;other biological processes	non-structural extracellular;plasma membrane;other membranes	signal transduction activity or receptor binding;other molecular function	Pf07686		A0A075B6R2	ENSG00000276775; ENSG00000282223
P01861	IGHG4	1.07705	0.457761	Not Significant	Immunoglobulin heavy constant gamma 4 [OS=Homo sapiens]	cell organization and biogenesis;stress response;transport;signal transduction;other biological processes	non-structural extracellular;plasma membrane;other membranes	signal transduction activity or receptor binding;other molecular function	Pf07654		P01861	ENSG00000211892; ENSG00000277016		Initial triggering of complement; Classical antibody-mediated complement activation; FCGR activation; Regulation of actin dynamics for phagocytic cup formation; Role of phospholipids in phagocytosis; FCGR3A-mediated IL10 synthesis; FCGR3A-mediated phagocytosis; Regulation of Complement cascade; Interleukin-4 and Interleukin-13 signaling
A0A0A0MRZ8	IGKV3D-11	1.07537	0.328279	Not Significant	Immunoglobulin kappa variable 3D-11 [OS=Homo sapiens]	other biological processes	non-structural extracellular;plasma membrane;other membranes;other cell component		Pf07686		A0A0A0MRZ8	ENSG00000211632
P04433	IGKV3-11	1.07537	0.328279	Not Significant	Immunoglobulin kappa variable 3-11 [OS=Homo sapiens]	other biological processes	non-structural extracellular;plasma membrane;other membranes;other cell component	other molecular function	Pf07686		P04433	ENSG00000241351; ENSG00000282823		Initial triggering of complement; Classical antibody-mediated complement activation; Immunoregulatory interactions between a Lymphoid and a non-Lymphoid cell; Cell surface interactions at the vascular wall; FCGR activation; Regulation of actin dynamics for phagocytic cup formation; Role of phospholipids in phagocytosis; Scavenging of heme from plasma; Role of LAT2/NTAL/LAB on calcium mobilization…
P35858	IGFALS	1.07497	0.315957	Not Significant	Insulin-like growth factor-binding protein complex acid labile subunit [OS=Homo sapiens]	cell adhesion;signal transduction	non-structural extracellular;extracellular matrix	other molecular function	Pf01462, Pf13855	3483	B4DZY8; E9PGU3; hsa:3483; P35858	ENSG00000099769		Regulation of Insulin-like Growth Factor (IGF) transport and uptake by Insulin-like Growth Factor Binding Proteins (IGFBPs)
Q9UNW1	MINPP1	1.07366	0.453674	Not Significant	Multiple inositol polyphosphate phosphatase 1 [OS=Homo sapiens]	protein metabolism;other metabolic processes;developmental processes;other biological processes	ER/Golgi	other molecular function	Pf00328	9562	F5H683; hsa:9562; O95172; O95286; Q59EJ2; Q9UGA3; Q9UNW1	ENSG00000107789		Synthesis of IPs in the ER lumen
P60174	TPI1	1.07047	0.481716	Not Significant	Triosephosphate isomerase [OS=Homo sapiens]	other metabolic processes	cytosol	other molecular function	Pf00121	7167	B7Z5D8; D3DUS9; hsa:7167; P00938; P60174; Q6FHP9; Q6IS07; Q8WWD0; Q96AG5	ENSG00000111669	Fatty acid beta-oxidation; Cori cycle; HIF1A and PPARG regulation of glycolysis; Clear cell renal cell carcinoma pathways; Aerobic glycolysis; Glycolysis and gluconeogenesis	Glycolysis; Gluconeogenesis
P01011	SERPINA3	1.06968	0.486605	Not Significant	Alpha-1-antichymotrypsin [OS=Homo sapiens]	stress response;other biological processes	non-structural extracellular;nucleus;other cytoplasmic organelle;other cell component	enzyme regulator activity;nucleic acid binding activity	Pf00079	12	B3KVQ7; hsa:12; P01011; Q13703; Q2TU87; Q2TU88; Q59GP9; Q6LBY8; Q6LDT7; Q6NSC9; Q8N177; Q96DW8; Q9UC47; Q9UNU9	ENSG00000196136	Selenium micronutrient network; Vitamin B12 metabolism; Folate metabolism	Neutrophil degranulation; Platelet degranulation
A0A0C4DH43	IGHV2-70D	1.06892	0.582392	Not Significant	Immunoglobulin heavy variable 2-70D [OS=Homo sapiens]	cell organization and biogenesis;stress response;transport;signal transduction;other biological processes	non-structural extracellular;plasma membrane;other membranes	signal transduction activity or receptor binding;other molecular function	Pf07686		A0A0C4DH43	ENSG00000211974; ENSG00000282482
O43866	CD5L	1.06874	0.449897	Not Significant	CD5 antigen-like [OS=Homo sapiens]	protein metabolism;other metabolic processes;stress response;transport;other biological processes	non-structural extracellular;plasma membrane;other membranes;other cell component	other molecular function	Pf00530	922	A8K7M5; hsa:922; O43866; Q6UX63	ENSG00000073754
P01594	IGKV1-33	1.06398	0.473054	Not Significant	Immunoglobulin kappa variable 1-33 [OS=Homo sapiens]	other biological processes	non-structural extracellular;plasma membrane;other membranes;other cell component	other molecular function	Pf07686		A0A087WZH9; P01594; P01603	ENSG00000242076; ENSG00000282811		Initial triggering of complement; Classical antibody-mediated complement activation; Immunoregulatory interactions between a Lymphoid and a non-Lymphoid cell; Cell surface interactions at the vascular wall; FCGR activation; Regulation of actin dynamics for phagocytic cup formation; Role of phospholipids in phagocytosis; Scavenging of heme from plasma; Role of LAT2/NTAL/LAB on calcium mobilization…
P61769	B2M	1.06	0.365384	Not Significant	Beta-2-microglobulin [OS=Homo sapiens]	cell organization and biogenesis;protein metabolism;other metabolic processes;stress response;transport;developmental processes;other biological processes	non-structural extracellular;plasma membrane;other membranes;cytosol;ER/Golgi;other cytoplasmic organelle;other cell component	other molecular function	Pf07654	567	hsa:567; P01884; P61769; Q540F8; Q6IAT8; Q9UCK0; Q9UD48; Q9UDF4	ENSG00000166710; ENSG00000273686	IL-18 signaling pathway	Immunoregulatory interactions between a Lymphoid and a non-Lymphoid cell; Neutrophil degranulation; Amyloid fiber formation; ER-Phagosome pathway; Interferon gamma signaling; Antigen Presentation: Folding, assembly and peptide loading of class I MHC; Endosomal/Vacuolar pathway; DAP12 signaling; Modulation by Mtb of host immune system; Nef mediated downregulation of MHC class I complex cell surfac…
P08195	SLC3A2	1.05777	0.46308	Not Significant	4F2 cell-surface antigen heavy chain [OS=Homo sapiens]	other metabolic processes;transport;other biological processes	plasma membrane;other membranes;nucleus;other cytoplasmic organelle;other cell component	transporter activity;nucleic acid binding activity;other molecular function	Pf00128, Pf16028	6520	hsa:6520; P08195; Q13543	ENSG00000168003	Ferroptosis; Proximal tubule transport; Malignant pleural mesothelioma	Tryptophan catabolism; Basigin interactions; Amino acid transport across the plasma membrane; Defective SLC7A7 causes lysinuric protein intolerance (LPI)
P01700	IGLV1-47	1.05555	0.529635	Not Significant	Immunoglobulin lambda variable 1-47 [OS=Homo sapiens]	other biological processes	non-structural extracellular;plasma membrane;other membranes;other cell component	other molecular function	Pf07686		A0A075B6I8; P01700; P04208	ENSG00000211648		Initial triggering of complement; Classical antibody-mediated complement activation; Immunoregulatory interactions between a Lymphoid and a non-Lymphoid cell; Cell surface interactions at the vascular wall; FCGR activation; Regulation of actin dynamics for phagocytic cup formation; Role of phospholipids in phagocytosis; Scavenging of heme from plasma; Role of LAT2/NTAL/LAB on calcium mobilization…
P02656	APOC3	1.05507	0.567282	Not Significant	Apolipoprotein C-III [OS=Homo sapiens]	cell organization and biogenesis;protein metabolism;other metabolic processes;transport;signal transduction;other biological processes	non-structural extracellular;other cytoplasmic organelle	signal transduction activity or receptor binding;enzyme regulator activity;other molecular function	Pf05778	345	hsa:345; P02656; Q08E83; Q6Q786	ENSG00000110245	PPAR-alpha pathway; Nuclear receptors meta-pathway; PPAR signaling pathway; Statin inhibition of cholesterol production	Retinoid metabolism and transport; Chylomicron assembly; Chylomicron remodeling; HDL remodeling
P01768	IGHV3-30	1.05381	0.66303	Not Significant	Immunoglobulin heavy variable 3-30 [OS=Homo sapiens]	cell organization and biogenesis;stress response;transport;signal transduction;other biological processes	non-structural extracellular;plasma membrane;other membranes	signal transduction activity or receptor binding;other molecular function	Pf07686		A0A0B4J2B7; P01768; P01769; P01770; P01773	ENSG00000270550; ENSG00000282777		Initial triggering of complement; Classical antibody-mediated complement activation; Immunoregulatory interactions between a Lymphoid and a non-Lymphoid cell; Cell surface interactions at the vascular wall; FCGR activation; Regulation of actin dynamics for phagocytic cup formation; Role of phospholipids in phagocytosis; Scavenging of heme from plasma; Role of LAT2/NTAL/LAB on calcium mobilization…
A0A0B4J1V0	IGHV3-15	1.04986	0.533039	Not Significant	Immunoglobulin heavy variable 3-15 [OS=Homo sapiens]	cell organization and biogenesis;stress response;transport;signal transduction;other biological processes	non-structural extracellular;plasma membrane;other membranes	signal transduction activity or receptor binding;other molecular function	Pf07686		A0A0B4J1V0	ENSG00000211943; ENSG00000282290
P12814	ACTN1	1.03996	0.702263	Not Significant	Alpha-actinin-1 [OS=Homo sapiens]	cell adhesion;cell organization and biogenesis;developmental processes;other biological processes	non-structural extracellular;plasma membrane;other membranes;cytosol;cytoskeleton;other cell component	signal transduction activity or receptor binding;cytoskeletal activity;nucleic acid binding activity;other molecular function	Pf00307, Pf00435, Pf08726	87	B3V8S3; B4DHH3; B7TY16; hsa:87; P12814; Q1HE25; Q9BTN1	ENSG00000072110	Arrhythmogenic right ventricular cardiomyopathy; Focal adhesion; Ebola virus pathway in host; MFAP5 effect on permeability and motility of endothelial cells via cytoskeleton rearrangement; Regulation of actin cytoskeleton	Platelet degranulation ; Syndecan interactions; RHOD GTPase cycle; RHOF GTPase cycle; Nephrin family interactions; RHOBTB2 GTPase cycle; Regulation of cytoskeletal remodeling and cell spreading by IPP complex components
P11597	CETP	1.03863	0.550429	Not Significant	Cholesteryl ester transfer protein [OS=Homo sapiens]	cell organization and biogenesis;other metabolic processes;transport;other biological processes	non-structural extracellular;other cell component	transporter activity;other molecular function	Pf01273, Pf02886	1071	hsa:1071; P11597; Q13987; Q13988; Q53YZ1	ENSG00000087237	Statin pathway; Lipid particles composition; Statin inhibition of cholesterol production; Metabolic pathway of LDL, HDL and TG, including diseases; IL-18 signaling pathway; Familial hyperlipidemia type 1; Familial hyperlipidemia type 2; Familial hyperlipidemia type 3; Familial hyperlipidemia type 4; Familial hyperlipidemia type 5	HDL remodeling; NR1H3 & NR1H2 regulate gene expression linked to cholesterol transport and efflux; LDL remodeling
A0A0B4J1Y8	IGLV9-49	1.03695	0.726749	Not Significant	Immunoglobulin lambda variable 9-49 [OS=Homo sapiens]	other biological processes	non-structural extracellular;plasma membrane;other membranes;other cell component		Pf07686		A0A0B4J1Y8	ENSG00000223350
P00742	F10	1.03065	0.671764	Not Significant	Coagulation factor X [OS=Homo sapiens]	protein metabolism;stress response;other biological processes	non-structural extracellular;plasma membrane;other membranes;ER/Golgi	other molecular function	Pf00008, Pf00089, Pf00594, Pf14670	2159	hsa:2159; P00742; Q14340	ENSG00000126218	Blood clotting cascade; Complement system; Complement and coagulation cascades	Common Pathway of Fibrin Clot Formation; Intrinsic Pathway of Fibrin Clot Formation; Gamma-carboxylation of protein precursors; Transport of gamma-carboxylated protein precursors from the endoplasmic reticulum to the Golgi apparatus; Removal of aminoterminal propeptides from gamma-carboxylated proteins; Defective factor IX causes thrombophilia; Defective cofactor function of FVIIIa variant; Defec…
P01717	IGLV3-25	1.02303	0.828237	Not Significant	Immunoglobulin lambda variable 3-25 [OS=Homo sapiens]	other biological processes	non-structural extracellular;plasma membrane;other membranes;other cell component	other molecular function	Pf07686		A0A075B6J4; P01717	ENSG00000211659		Initial triggering of complement; Classical antibody-mediated complement activation; Immunoregulatory interactions between a Lymphoid and a non-Lymphoid cell; Cell surface interactions at the vascular wall; FCGR activation; Regulation of actin dynamics for phagocytic cup formation; Role of phospholipids in phagocytosis; Scavenging of heme from plasma; Role of LAT2/NTAL/LAB on calcium mobilization…
B9A064	IGLL5	1.02233	0.812311	Not Significant	Immunoglobulin lambda-like polypeptide 5 [OS=Homo sapiens]	cell organization and biogenesis;stress response;transport;signal transduction;other biological processes	non-structural extracellular;plasma membrane;other membranes	signal transduction activity or receptor binding;other molecular function	Pf07654	100423062	B9A064; hsa:100423062	ENSG00000254709
A0A0B4J1Y9	IGHV3-72	1.02151	0.817085	Not Significant	Immunoglobulin heavy variable 3-72 [OS=Homo sapiens]	cell organization and biogenesis;stress response;transport;signal transduction;other biological processes	non-structural extracellular;plasma membrane;other membranes	signal transduction activity or receptor binding;other molecular function	Pf07686		A0A087WW89; A0A0B4J1Y9	ENSG00000225698; ENSG00000278042
P22352	GPX3	1.02048	0.749881	Not Significant	Glutathione peroxidase 3 [OS=Homo sapiens]	other metabolic processes;stress response;other biological processes	non-structural extracellular	other molecular function	Pf00255	2878	hsa:2878; O43787; P22352; Q86W78; Q9NZ74; Q9UEL1	ENSG00000211445	Glutathione metabolism; Selenium micronutrient network; Folate metabolism; Nuclear receptors meta-pathway; NRF2 pathway; One-carbon metabolism and related pathways; Oxidative stress response; Metapathway biotransformation Phase I and II	Detoxification of Reactive Oxygen Species
P01742	IGHV1-69	1.02021	0.856681	Not Significant	Immunoglobulin heavy variable 1-69 [OS=Homo sapiens]	cell organization and biogenesis;stress response;transport;signal transduction;other biological processes	non-structural extracellular;plasma membrane;other membranes	signal transduction activity or receptor binding;other molecular function	Pf07686		A0A0B4J1V5; P01742; P01760; P01761	ENSG00000211973; ENSG00000282350		Initial triggering of complement; Classical antibody-mediated complement activation; Immunoregulatory interactions between a Lymphoid and a non-Lymphoid cell; Cell surface interactions at the vascular wall; FCGR activation; Regulation of actin dynamics for phagocytic cup formation; Role of phospholipids in phagocytosis; Scavenging of heme from plasma; Role of LAT2/NTAL/LAB on calcium mobilization…
P60709	ACTB	1.01968	0.872255	Not Significant	Actin, cytoplasmic 1 [OS=Homo sapiens]	cell organization and biogenesis;transport;developmental processes;other biological processes	plasma membrane;other membranes;cytosol;cytoskeleton;nucleus;other cell component	cytoskeletal activity;other molecular function	Pf00022	60	hsa:60; P02570; P60709; P70514; P99021; Q11211; Q64316; Q75MN2; Q96B34; Q96HG5	ENSG00000075624	Arrhythmogenic right ventricular cardiomyopathy; Pathogenic Escherichia coli infection; Common pathways underlying drug addiction; Myometrial relaxation and contraction pathways; Focal adhesion; Fas ligand pathway and stress induction of heat shock proteins; Ebola virus pathway in host; Acute viral myocarditis; Thermogenesis; Mechanoregulation and pathology of YAP/TAZ via Hippo and non-Hippo mech…	Regulation of actin dynamics for phagocytic cup formation; FCGR3A-mediated phagocytosis; Factors involved in megakaryocyte development and platelet production; Signaling by BRAF and RAF1 fusions; Signaling by moderate kinase activity BRAF mutants; Paradoxical activation of RAF signaling by kinase inactive BRAF; Signaling downstream of RAS mutants; Signaling by RAF1 mutants; MAP2K and MAPK activat…
P63261	ACTG1	1.01968	0.872255	Not Significant	Actin, cytoplasmic 2 [OS=Homo sapiens]	cell organization and biogenesis;stress response;transport;developmental processes;other biological processes	non-structural extracellular;plasma membrane;other membranes;cytosol;cytoskeleton;other cell component	cytoskeletal activity;other molecular function	Pf00022	71	A8K7C2; hsa:71; P02571; P14104; P63261; P99022; Q5U032; Q96E67	ENSG00000184009	Arrhythmogenic right ventricular cardiomyopathy; Pathogenic Escherichia coli infection; Common pathways underlying drug addiction; Myometrial relaxation and contraction pathways; Focal adhesion; Fas ligand pathway and stress induction of heat shock proteins; Striated muscle contraction pathway; VEGFA-VEGFR2 signaling pathway; Ebola virus pathway in host; Thermogenesis; Mechanoregulation and patho…	Regulation of actin dynamics for phagocytic cup formation; FCGR3A-mediated phagocytosis; Signaling by BRAF and RAF1 fusions; Signaling by moderate kinase activity BRAF mutants; Paradoxical activation of RAF signaling by kinase inactive BRAF; Signaling downstream of RAS mutants; Signaling by RAF1 mutants; MAP2K and MAPK activation; Signaling by high-kinase activity BRAF mutants; Clathrin-mediated …
P05156	CFI	1.01742	0.85048	Not Significant	Complement factor I [OS=Homo sapiens]	protein metabolism;stress response;transport;other biological processes	non-structural extracellular;other membranes	other molecular function	Pf00057, Pf00089, Pf00530	3426	hsa:3426; O60442; P05156	ENSG00000205403	Complement system; Complement system in neuronal development and plasticity; Network map of SARS-CoV-2 signaling pathway; Complement and coagulation cascades	Regulation of Complement cascade
P02654	APOC1	1.0156	0.858952	Not Significant	Apolipoprotein C-I [OS=Homo sapiens]	cell organization and biogenesis;protein metabolism;other metabolic processes;transport;other biological processes	non-structural extracellular;ER/Golgi	enzyme regulator activity;other molecular function	Pf04691	341	B2R526; hsa:341; P02654; Q6IB97	ENSG00000130208	Statin inhibition of cholesterol production	NR1H3 & NR1H2 regulate gene expression linked to cholesterol transport and efflux; VLDL assembly; VLDL clearance
A0A0B4J1V2	IGHV2-26	1.01464	0.878949	Not Significant	Immunoglobulin heavy variable 2-26 [OS=Homo sapiens]	cell organization and biogenesis;stress response;transport;signal transduction;other biological processes	non-structural extracellular;plasma membrane;other membranes	signal transduction activity or receptor binding;other molecular function	Pf07686		A0A0B4J1V2	ENSG00000211951; ENSG00000282344
P01860	IGHG3	1.01374	0.876221	Not Significant	Immunoglobulin heavy constant gamma 3 [OS=Homo sapiens]	cell organization and biogenesis;stress response;transport;signal transduction;other biological processes	non-structural extracellular;plasma membrane;other membranes	signal transduction activity or receptor binding;other molecular function	Pf07654		A0A075B6N8; A2NU35; P01860			Initial triggering of complement; Classical antibody-mediated complement activation; FCGR activation; Regulation of actin dynamics for phagocytic cup formation; Role of phospholipids in phagocytosis; FCGR3A-mediated IL10 synthesis; FCGR3A-mediated phagocytosis; Regulation of Complement cascade
A0A075B6Q5	IGHV3-64	1.00883	0.941532	Not Significant	Immunoglobulin heavy variable 3-64 [OS=Homo sapiens]	cell organization and biogenesis;stress response;transport;signal transduction;other biological processes	non-structural extracellular;plasma membrane;other membranes	signal transduction activity or receptor binding;other molecular function	Pf07686		A0A075B6Q5	ENSG00000223648; ENSG00000274236
O14791	APOL1	1.00546	0.967007	Not Significant	Apolipoprotein L1 [OS=Homo sapiens]	protein metabolism;other metabolic processes;stress response;transport	non-structural extracellular;other membranes;ER/Golgi	transporter activity;other molecular function	Pf05461	8542	A5PLQ4; B4DU12; E9PF24; hsa:8542; O14791; O60804; Q5R3P7; Q5R3P8; Q96AB8; Q96PM4; Q9BQ03	ENSG00000100342	Nephrotic syndrome	Scavenging of heme from plasma; Regulation of Insulin-like Growth Factor (IGF) transport and uptake by Insulin-like Growth Factor Binding Proteins (IGFBPs); Post-translational protein phosphorylation
P01591	JCHAIN	1.00193	0.981948	Not Significant	Immunoglobulin J chain [OS=Homo sapiens]	cell organization and biogenesis;stress response;other biological processes	non-structural extracellular	signal transduction activity or receptor binding;other molecular function	Pf15097	3512	hsa:3512; P01591	ENSG00000132465		Cell surface interactions at the vascular wall; Scavenging of heme from plasma
P63104	YWHAZ	1.00149	0.990736	Not Significant	14-3-3 protein zeta/delta [OS=Homo sapiens]	cell organization and biogenesis;protein metabolism;other metabolic processes;transport;developmental processes;signal transduction;other biological processes	cytosol;nucleus;other cell component	other molecular function	Pf00244	7534	A8K1N0; B7Z465; hsa:7534; P29213; P29312; P63104; Q32P43; Q5XJ08; Q6GPI2; Q6IN74; Q6NUR9; Q6P3U9; Q86V33	ENSG00000164924	Cell cycle; Prolactin signaling pathway; Pathogenic Escherichia coli infection; Myometrial relaxation and contraction pathways; Hepatitis B infection; Calcium regulation in cardiac cells; Sudden infant death syndrome (SIDS) susceptibility pathways	GP1b-IX-V activation signalling; Translocation of SLC2A4 (GLUT4) to the plasma membrane; Regulation of localization of FOXO transcription factors; TP53 Regulates Metabolic Genes; Chk1/Chk2(Cds1) mediated inactivation of Cyclin B:Cdk1 complex; RHO GTPases activate PKNs; Rap1 signalling; Activation of BAD and translocation to mitochondria ; Negative regulation of NOTCH4 signaling; Deactivation of t…
P07357	C8A	1.00024	0.996838	Not Significant	Complement component C8 alpha chain [OS=Homo sapiens]	stress response;other biological processes	non-structural extracellular;plasma membrane;other membranes	other molecular function	Pf00057, Pf00090, Pf01823	731	A2RUI4; A2RUI5; hsa:731; P07357; Q13668; Q9H130	ENSG00000157131	Allograft Rejection; Complement system; Complement system in neuronal development and plasticity; Network map of SARS-CoV-2 signaling pathway; Complement activation	Regulation of Complement cascade; Terminal pathway of complement
P09871	C1S	-1.00408	0.942399	Not Significant	Complement C1s subcomponent [OS=Homo sapiens]	protein metabolism;stress response;other biological processes	non-structural extracellular	other molecular function	Pf00084, Pf00089, Pf00431, Pf14670	716	D3DUT4; hsa:716; P09871; Q9UCU7; Q9UCU8; Q9UCU9; Q9UCV0; Q9UCV1; Q9UCV2; Q9UCV3; Q9UCV4; Q9UCV5; Q9UM14	ENSG00000182326	Complement system; Oxidative damage response; Complement system in neuronal development and plasticity; Network map of SARS-CoV-2 signaling pathway; Complement activation; Complement and coagulation cascades	Initial triggering of complement; Classical antibody-mediated complement activation; Regulation of Complement cascade
A0A0A0MS15	IGHV3-49	-1.00418	0.955948	Not Significant	Immunoglobulin heavy variable 3-49 [OS=Homo sapiens]	cell organization and biogenesis;stress response;transport;signal transduction;other biological processes	non-structural extracellular;plasma membrane;other membranes	signal transduction activity or receptor binding;other molecular function	Pf07686		A0A0A0MS15	ENSG00000211965; ENSG00000275316
Q9BTY2	FUCA2	-1.00808	0.919289	Not Significant	Plasma alpha-L-fucosidase [OS=Homo sapiens]	other metabolic processes;other biological processes	non-structural extracellular;ER/Golgi;other cytoplasmic organelle	other molecular function	Pf01120, Pf16757	2519	E9PEB6; hsa:2519; Q7Z6V1; Q7Z6Y2; Q8NBK4; Q9BTY2	ENSG00000001036		Regulation of Insulin-like Growth Factor (IGF) transport and uptake by Insulin-like Growth Factor Binding Proteins (IGFBPs); Post-translational protein phosphorylation; Neutrophil degranulation
P01008	SERPINC1	-1.01068	0.877163	Not Significant	Antithrombin-III [OS=Homo sapiens]	stress response;transport;developmental processes;other biological processes	non-structural extracellular;plasma membrane;other membranes;ER/Golgi	enzyme regulator activity;other molecular function	Pf00079	462	B2R6P0; hsa:462; P01008; P78439; P78447; Q13815; Q5TC78; Q7KZ43; Q7KZ97; Q9UC78	ENSG00000117601	Complement and coagulation cascades	Regulation of Insulin-like Growth Factor (IGF) transport and uptake by Insulin-like Growth Factor Binding Proteins (IGFBPs); Post-translational protein phosphorylation; Common Pathway of Fibrin Clot Formation; Intrinsic Pathway of Fibrin Clot Formation
A0A075B6K5	IGLV3-9	-1.01158	0.920358	Not Significant	Immunoglobulin lambda variable 3-9 [OS=Homo sapiens]	other biological processes	non-structural extracellular;plasma membrane;other membranes;other cell component		Pf07686		A0A075B6K5	ENSG00000211670
P00748	F12	-1.01268	0.908922	Not Significant	Coagulation factor XII [OS=Homo sapiens]	protein metabolism;other metabolic processes;stress response;other biological processes	non-structural extracellular;plasma membrane;other membranes;ER/Golgi	other molecular function	Pf00008, Pf00039, Pf00040, Pf00051, Pf00089	2161	hsa:2161; P00748; P78339	ENSG00000131187	Blood clotting cascade; RAS and bradykinin pathways in COVID-19; Angiotensin II receptor type 1 pathway; Complement and coagulation cascades	Intrinsic Pathway of Fibrin Clot Formation; Defective factor XII causes hereditary angioedema; Defective SERPING1 causes hereditary angioedema
P04746	AMY2A	-1.01363	0.882025	Not Significant	Pancreatic alpha-amylase [OS=Homo sapiens]	other metabolic processes;other biological processes	non-structural extracellular	other molecular function	Pf00128, Pf02806	279	B9EJG1; hsa:279; P04746; Q9UBH3	ENSG00000243480		Digestion of dietary carbohydrate
P0DUB6	AMY1A	-1.01363	0.882025	Not Significant	Alpha-amylase 1A [OS=Homo sapiens]	other metabolic processes	non-structural extracellular	other molecular function	Pf00128, Pf02806	276; 277; 278	A6NJS5; A8K8H6; hsa:276; hsa:277; hsa:278; P04745; P0DUB6; Q13763; Q5T083	ENSG00000237763		Digestion of dietary carbohydrate
P19961	AMY2B	-1.01363	0.882025	Not Significant	Alpha-amylase 2B [OS=Homo sapiens]	other metabolic processes		other molecular function	Pf00128, Pf02806	280	B3KTI1; B3KXB7; D3DT76; hsa:280; P19961; Q9UBH3	ENSG00000240038		Digestion of dietary carbohydrate
P01782	IGHV3-9	-1.01812	0.842201	Not Significant	Immunoglobulin heavy variable 3-9 [OS=Homo sapiens]	cell organization and biogenesis;stress response;transport;signal transduction;other biological processes	non-structural extracellular;plasma membrane;other membranes	signal transduction activity or receptor binding;other molecular function	Pf07686		P01782			Initial triggering of complement; Classical antibody-mediated complement activation; Immunoregulatory interactions between a Lymphoid and a non-Lymphoid cell; Cell surface interactions at the vascular wall; FCGR activation; Regulation of actin dynamics for phagocytic cup formation; Role of phospholipids in phagocytosis; Scavenging of heme from plasma; Role of LAT2/NTAL/LAB on calcium mobilization…
P0DP04	IGHV3-43D	-1.01812	0.842201	Not Significant	Immunoglobulin heavy variable 3-43D [OS=Homo sapiens]	cell organization and biogenesis;stress response;transport;signal transduction;other biological processes	non-structural extracellular;plasma membrane;other membranes	signal transduction activity or receptor binding;other molecular function	Pf07686		P0DP04
P02753	RBP4	-1.02476	0.785424	Not Significant	Retinol-binding protein 4 [OS=Homo sapiens]	other metabolic processes;transport;developmental processes;other biological processes	non-structural extracellular;other cell component	transporter activity;other molecular function	Pf00061	5950	D3DR38; hsa:5950; O43478; O43479; P02753; Q5VY24; Q8WWA3; Q9P178	ENSG00000138207	Sterol regulatory element-binding proteins (SREBP) signaling; Vitamin A and carotenoid metabolism	Retinoid metabolism and transport; The canonical retinoid cycle in rods (twilight vision); Retinoid cycle disease events; Retinoid metabolism disease events
O00299	CLIC1	-1.0275	0.82838	Not Significant	Chloride intracellular channel protein 1 [OS=Homo sapiens]	other metabolic processes;transport;signal transduction;other biological processes	non-structural extracellular;plasma membrane;other membranes;mitochondrion;nucleus;other cell component	transporter activity	Pf13409, Pf13410	1192	hsa:1192; O00299; Q15089; Q502X1	ENSG00000206394; ENSG00000213719; ENSG00000223639; ENSG00000226248; ENSG00000226417; ENSG00000226651; ENSG00000230685	VEGFA-VEGFR2 signaling pathway
P05090	APOD	-1.02755	0.753046	Not Significant	Apolipoprotein D [OS=Homo sapiens]	cell organization and biogenesis;other metabolic processes;stress response;transport;developmental processes;other biological processes	non-structural extracellular;cytosol;ER/Golgi;translational apparatus;other cell component	transporter activity;other molecular function	Pf00061	347	B2R579; D3DNW6; hsa:347; P05090; Q6IBG6	ENSG00000189058		NR1H3 & NR1H2 regulate gene expression linked to cholesterol transport and efflux; Transport of fatty acids
Q96PD5	PGLYRP2	-1.02842	0.654759	Not Significant	N-acetylmuramoyl-L-alanine amidase [OS=Homo sapiens]	other metabolic processes;stress response;other biological processes	non-structural extracellular;other membranes	other molecular function	Pf01510	114770	A8K050; A8K8C7; B2RMZ2; B7ZM33; hsa:114770; Q68CK1; Q96N74; Q96PD5; Q9UC60	ENSG00000161031		Antimicrobial peptides
Q8N149	LILRA2	-1.03557	0.539528	Not Significant	Leukocyte immunoglobulin-like receptor subfamily A member 2 [OS=Homo sapiens]	stress response;signal transduction;other biological processes	non-structural extracellular;plasma membrane;other membranes	other molecular function	Pf00047, Pf13895	11027	hsa:11027; O75020; Q8N149	ENSG00000239998; ENSG00000274000; ENSG00000275290; ENSG00000278634		Immunoregulatory interactions between a Lymphoid and a non-Lymphoid cell
P02655	APOC2	-1.04377	0.720503	Not Significant	Apolipoprotein C-II [OS=Homo sapiens]	cell organization and biogenesis;other metabolic processes;transport;other biological processes	non-structural extracellular;other cytoplasmic organelle	enzyme regulator activity;other molecular function	Pf05355	344	C0JYY4; hsa:344; P02655; Q9BS39; Q9UDE3; Q9UNK3	ENSG00000234906	MECP2 and associated Rett syndrome; Statin inhibition of cholesterol production; Familial hyperlipidemia type 1; Familial hyperlipidemia type 4; Familial hyperlipidemia type 5	Retinoid metabolism and transport; Chylomicron assembly; Chylomicron remodeling; HDL remodeling; NR1H3 & NR1H2 regulate gene expression linked to cholesterol transport and efflux; Assembly of active LPL and LIPC lipase complexes
Q12805	EFEMP1	-1.04623	0.463793	Not Significant	EGF-containing fibulin-like extracellular matrix protein 1 [OS=Homo sapiens]	protein metabolism;other metabolic processes;developmental processes;signal transduction;other biological processes	non-structural extracellular;extracellular matrix	signal transduction activity or receptor binding;kinase activity;other molecular function	Pf07645, Pf12662	2202	A8K3I4; B4DW75; D6W5D2; hsa:2202; Q12805; Q541U7	ENSG00000115380		Molecules associated with elastic fibres
P10321	HLA-C	-1.04996	0.590798	Not Significant	HLA class I histocompatibility antigen, C alpha chain [OS=Homo sapiens]	stress response;other biological processes	plasma membrane;other membranes;ER/Golgi;other cytoplasmic organelle;other cell component	other molecular function	Pf00129, Pf06623, Pf07654	3107	hsa:3107; O02863; O02864; O02865; O02866; O02958; O19505; O19652; O19676; O62879; O62882; O62883; O62888; O78060; O78061; O78062; O78063; O78067; O78068; O78069; O78072; O78083; O78090; O78091; O78149; O78165; O78166; O78178; O78202; O78203; O78211; O78214; P04222; P10321; P30499; P30500; P30501; P30502; P30503; P30504; P30505; P30506; P30507; P30508; P30509; P30510; P79498; Q07000; Q29631; Q2964…	ENSG00000204525	Proteasome degradation; Allograft Rejection; Ebola virus pathway in host	Immunoregulatory interactions between a Lymphoid and a non-Lymphoid cell; Neutrophil degranulation; ER-Phagosome pathway; DAP12 interactions; Interferon gamma signaling; Interferon alpha/beta signaling; Antigen Presentation: Folding, assembly and peptide loading of class I MHC; Endosomal/Vacuolar pathway
A0M8Q6	IGLC7	-1.05303	0.604698	Not Significant	Immunoglobulin lambda constant 7 [OS=Homo sapiens]	cell organization and biogenesis;stress response;transport;signal transduction;other biological processes	non-structural extracellular;plasma membrane;other membranes	signal transduction activity or receptor binding;other molecular function	Pf07654		A0A075B6L1; A0M8Q6			Initial triggering of complement; Classical antibody-mediated complement activation; Immunoregulatory interactions between a Lymphoid and a non-Lymphoid cell; Cell surface interactions at the vascular wall; FCGR activation; Regulation of actin dynamics for phagocytic cup formation; Role of phospholipids in phagocytosis; Scavenging of heme from plasma; Role of LAT2/NTAL/LAB on calcium mobilization…
Q6EMK4	VASN	-1.05529	0.495941	Not Significant	Vasorin [OS=Homo sapiens]	stress response;other biological processes	non-structural extracellular;extracellular matrix;plasma membrane;other membranes;mitochondrion;other cell component	other molecular function	Pf00008, Pf13855	114990	hsa:114990; Q6EMK4; Q6UXL4; Q6UXL5; Q96CX1	ENSG00000168140; ENSG00000274334
P11226	MBL2	-1.05742	0.702619	Not Significant	Mannose-binding protein C [OS=Homo sapiens]	stress response;other biological processes	non-structural extracellular;extracellular matrix;other cell component	signal transduction activity or receptor binding;other molecular function	Pf00059, Pf01391	4153	hsa:4153; P11226; Q4VB12; Q4VB13; Q4VB14; Q5SQS3; Q86SI4; Q96KE4; Q96TF7; Q96TF8; Q96TF9	ENSG00000165471	Regulation of toll-like receptor signaling pathway; Complement system; Ebola virus pathway in host; Complement system in neuronal development and plasticity	Initial triggering of complement; Lectin pathway of complement activation
P27797	CALR	-1.05778	0.629099	Not Significant	Calreticulin [OS=Homo sapiens]	cell organization and biogenesis;protein metabolism;other metabolic processes;stress response;transport;developmental processes;signal transduction;other biological processes	non-structural extracellular;extracellular matrix;plasma membrane;other membranes;cytosol;ER/Golgi;nucleus;other cytoplasmic organelle;other cell component	signal transduction activity or receptor binding;nucleic acid binding activity;other molecular function	Pf00262	811	hsa:811; P27797; Q6IAT4; Q9UDG2	ENSG00000179218	Androgen receptor signaling pathway; Complement system; Photodynamic therapy-induced unfolded protein response; VEGFA-VEGFR2 signaling pathway; Calcium regulation in cardiac cells	Scavenging by Class A Receptors; ER-Phagosome pathway; Scavenging by Class F Receptors; Antigen Presentation: Folding, assembly and peptide loading of class I MHC; ATF6 (ATF6-alpha) activates chaperone genes; Calnexin/calreticulin cycle; Assembly of Viral Components at the Budding Site
P00491	PNP	-1.06188	0.54363	Not Significant	Purine nucleoside phosphorylase [OS=Homo sapiens]	other metabolic processes;other biological processes	non-structural extracellular;cytosol;nucleus;other cell component	other molecular function	Pf01048	4860	B2R8S5; D3DS00; hsa:4860; P00491; Q15160; Q5PZ03	ENSG00000198805	VEGFA-VEGFR2 signaling pathway	Neutrophil degranulation; Purine catabolism; Purine salvage
P31946	YWHAB	-1.06222	0.564561	Not Significant	14-3-3 protein beta/alpha [OS=Homo sapiens]	transport;other biological processes	other membranes;cytosol;nucleus;other cytoplasmic organelle;other cell component	enzyme regulator activity;other molecular function	Pf00244	7529	A8K9K2; E1P616; hsa:7529; P31946	ENSG00000166913	Cell cycle; IL-3 signaling pathway; Myometrial relaxation and contraction pathways; Hepatitis B infection; Calcium regulation in cardiac cells; Sudden infant death syndrome (SIDS) susceptibility pathways	Signaling by BRAF and RAF1 fusions; Signaling by moderate kinase activity BRAF mutants; Paradoxical activation of RAF signaling by kinase inactive BRAF; Signaling downstream of RAS mutants; Signaling by RAF1 mutants; MAP2K and MAPK activation; Signaling by high-kinase activity BRAF mutants; Translocation of SLC2A4 (GLUT4) to the plasma membrane; Regulation of localization of FOXO transcription fa…
P61981	YWHAG	-1.06265	0.617759	Not Significant	14-3-3 protein gamma [OS=Homo sapiens]	transport;other biological processes	cytosol;other cell component	signal transduction activity or receptor binding;enzyme regulator activity;other molecular function	Pf00244	7532	hsa:7532; O70457; P35214; P61981; Q6FH52; Q9UDP2; Q9UN99	ENSG00000170027	Cell cycle; Prolactin signaling pathway; Myometrial relaxation and contraction pathways; Disruption of postsynaptic signaling by CNV; Calcium regulation in cardiac cells; Sudden infant death syndrome (SIDS) susceptibility pathways	Translocation of SLC2A4 (GLUT4) to the plasma membrane; Regulation of localization of FOXO transcription factors; TP53 Regulates Metabolic Genes; Chk1/Chk2(Cds1) mediated inactivation of Cyclin B:Cdk1 complex; RHO GTPases activate PKNs; Activation of BAD and translocation to mitochondria ; Recruitment of NuMA to mitotic centrosomes; Regulation of PLK1 Activity at G2/M Transition; Loss of Nlp from…
P07737	PFN1	-1.06383	0.607448	Not Significant	Profilin-1 [OS=Homo sapiens]	cell organization and biogenesis;developmental processes;other biological processes	cytosol;cytoskeleton;nucleus;other cell component	cytoskeletal activity;other molecular function	Pf00235	5216	hsa:5216; P07737; Q53Y44	ENSG00000108518	Physico-chemical features and toxicity-associated pathways; VEGFA-VEGFR2 signaling pathway; Burn wound healing; Regulation of actin cytoskeleton; G13 signaling pathway	Platelet degranulation ; RHO GTPases Activate Formins; PCP/CE pathway; Signaling by ROBO receptors
Q9H8L6	MMRN2	-1.06422	0.377453	Not Significant	Multimerin-2 [OS=Homo sapiens]	developmental processes;other biological processes	non-structural extracellular;extracellular matrix		Pf00386, Pf07546	79812	hsa:79812; Q504V7; Q6P2N2; Q9H8L6	ENSG00000173269	VEGFA-VEGFR2 signaling pathway
P02786	TFRC	-1.06455	0.431714	Not Significant	Transferrin receptor protein 1 [OS=Homo sapiens]	protein metabolism;other metabolic processes;transport;developmental processes;signal transduction;other biological processes	non-structural extracellular;plasma membrane;other membranes;other cytoplasmic organelle;other cell component	nucleic acid binding activity;other molecular function	Pf02225, Pf04253, Pf04389	7037	D3DXB0; hsa:7037; P02786; Q1HE24; Q59G55; Q9UCN0; Q9UCU5; Q9UDF9; Q9UK21	ENSG00000072274	Iron metabolism in placenta; Ferroptosis; 3q29 copy number variation syndrome	RHOC GTPase cycle; RND2 GTPase cycle; RHOA GTPase cycle; CDC42 GTPase cycle; RAC1 GTPase cycle; RHOQ GTPase cycle; RHOG GTPase cycle; RAC2 GTPase cycle; RAC3 GTPase cycle; RHOB GTPase cycle; RHOJ GTPase cycle; Golgi Associated Vesicle Biogenesis; RND1 GTPase cycle; Cargo recognition for clathrin-mediated endocytosis; Transferrin endocytosis and recycling; RHOH GTPase cycle
Q9UHG3	PCYOX1	-1.06516	0.384236	Not Significant	Prenylcysteine oxidase 1 [OS=Homo sapiens]	protein metabolism;other metabolic processes;transport	non-structural extracellular;plasma membrane;other membranes;other cytoplasmic organelle	other molecular function	Pf07156, Pf13450	51449	B2RB14; B7Z9P8; hsa:51449; O94982; Q8N4N5; Q96QM8; Q9UHG3	ENSG00000116005
P05160	F13B	-1.07201	0.426413	Not Significant	Coagulation factor XIII B chain [OS=Homo sapiens]	stress response	non-structural extracellular		Pf00084	2165	A8K3E5; hsa:2165; P05160; Q5VYL5	ENSG00000143278	Blood clotting cascade; Steroid biosynthesis; Complement and coagulation cascades	Common Pathway of Fibrin Clot Formation
P04196	HRG	-1.07406	0.494426	Not Significant	Histidine-rich glycoprotein [OS=Homo sapiens]	stress response;transport;developmental processes;other biological processes	non-structural extracellular;plasma membrane;other membranes;other cytoplasmic organelle;other cell component	signal transduction activity or receptor binding;enzyme regulator activity;other molecular function	Pf00031	3273	B9EK35; D3DNU7; hsa:3273; P04196	ENSG00000113905		Platelet degranulation ; Dissolution of Fibrin Clot
P02760	AMBP	-1.07476	0.264486	Not Significant	Protein AMBP [OS=Homo sapiens]	cell adhesion;protein metabolism;other metabolic processes;other biological processes	non-structural extracellular;plasma membrane;other membranes;other cell component	enzyme regulator activity;other molecular function	Pf00014, Pf00061	259	hsa:259; P00977; P02759; P02760; P78491; Q2TU33; Q5TBD7; Q9UC58; Q9UDI8	ENSG00000106927		Scavenging of heme from plasma
Q6YHK3	CD109	-1.07567	0.415752	Not Significant	CD109 antigen [OS=Homo sapiens]	developmental processes;other biological processes	non-structural extracellular;plasma membrane;other membranes;cytosol	enzyme regulator activity;other molecular function	Pf00207, Pf01835, Pf07677, Pf07678, Pf07703, Pf17791	135228	A5YKK4; B2R948; B3KW25; hsa:135228; Q0P6K7; Q5SYA8; Q5XUM7; Q5XUM9; Q6MZI7; Q6YHK3; Q8N3A7; Q8N915; Q8TDJ2; Q8TDJ3	ENSG00000156535		Post-translational modification: synthesis of GPI-anchored proteins; Platelet degranulation
O95445	APOM	-1.07734	0.25634	Not Significant	Apolipoprotein M [OS=Homo sapiens]	cell organization and biogenesis;protein metabolism;other metabolic processes;transport;other biological processes	non-structural extracellular	transporter activity;other molecular function	Pf11032	55937	B0UX98; hsa:55937; O95445; Q5SRP4; Q9P046; Q9UMP6	ENSG00000204444; ENSG00000206409; ENSG00000224290; ENSG00000226215; ENSG00000227567; ENSG00000231974; ENSG00000235754		Retinoid metabolism and transport
P06681	C2	-1.07865	0.274158	Not Significant	Complement C2 [OS=Homo sapiens]	protein metabolism;stress response;other biological processes	non-structural extracellular	other molecular function	Pf00084, Pf00089, Pf00092	717	B4DPF3; B4DV20; E9PFN7; hsa:717; O19694; P06681; Q13904	ENSG00000166278; ENSG00000204364; ENSG00000206372; ENSG00000226560; ENSG00000231543; ENSG00000235017; ENSG00000235696	Allograft Rejection; Complement system; Oxidative damage response; Complement system in neuronal development and plasticity; Complement activation; Complement and coagulation cascades	Initial triggering of complement; Regulation of Complement cascade; Activation of C3 and C5
P00739	HPR	-1.08065	0.436023	Not Significant	Haptoglobin-related protein [OS=Homo sapiens]	protein metabolism;other metabolic processes;stress response;other biological processes	non-structural extracellular	other molecular function	Pf00089	3250	hsa:3250; P00739; Q7LE20; Q92658; Q92659; Q9ULB0	ENSG00000261701		Scavenging of heme from plasma
Q15485	FCN2	-1.08406	0.422775	Not Significant	Ficolin-2 [OS=Homo sapiens]	stress response;transport;other biological processes	non-structural extracellular;extracellular matrix;other cell component	signal transduction activity or receptor binding;other molecular function	Pf00147, Pf01391	2220	A6NFG7; A8K478; hsa:2220; Q15485; Q6IS69; Q7M4P4; Q9UC57	ENSG00000160339	Complement system; Complement system in neuronal development and plasticity	Initial triggering of complement; Ficolins bind to repetitive carbohydrate structures on the target cell surface
Q06033	ITIH3	-1.08525	0.516806	Not Significant	Inter-alpha-trypsin inhibitor heavy chain H3 [OS=Homo sapiens]	other metabolic processes;other biological processes	non-structural extracellular;other cell component	enzyme regulator activity	Pf00092, Pf06668, Pf08487	3699	hsa:3699; Q06033; Q3B7H5; Q53F06; Q6LAM2; Q99085	ENSG00000162267	Network map of SARS-CoV-2 signaling pathway	Platelet degranulation
P19652	ORM2	-1.0858	0.365568	Not Significant	Alpha-1-acid glycoprotein 2 [OS=Homo sapiens]	stress response;other biological processes	non-structural extracellular;other cytoplasmic organelle;other cell component		Pf00061	5005	B2R5L2; hsa:5005; P19652; Q16571; Q5T538; Q6IB74	ENSG00000228278	Vitamin D receptor pathway	Neutrophil degranulation; Platelet degranulation
P80108	GPLD1	-1.08589	0.242401	Not Significant	Phosphatidylinositol-glycan-specific phospholipase D [OS=Homo sapiens]	protein metabolism;other metabolic processes;transport;developmental processes;signal transduction;other biological processes	non-structural extracellular;extracellular matrix;other cell component	other molecular function	Pf00882, Pf01839	2822	hsa:2822; P80108; Q15127; Q15128; Q2M2F2; Q5T3Y0; Q7Z6T8; Q8TCV0; Q8WW82; Q96ID6; Q9H167; Q9H4M1; Q9UJC9	ENSG00000112293		Post-translational modification: synthesis of GPI-anchored proteins
A0A075B6H7	IGKV3-7	-1.09009	0.400839	Not Significant	Probable non-functional immunoglobulin kappa variable 3-7 [OS=Homo sapiens]	other biological processes	non-structural extracellular;plasma membrane;other membranes;other cell component		Pf07686		A0A075B6H7	ENSG00000243063; ENSG00000282310
P01743	IGHV1-46	-1.09201	0.170386	Not Significant	Immunoglobulin heavy variable 1-46 [OS=Homo sapiens]	cell organization and biogenesis;stress response;transport;signal transduction;other biological processes	non-structural extracellular;plasma membrane;other membranes	signal transduction activity or receptor binding;other molecular function	Pf07686		A0A0B4J1V4; P01743; P06326; P80421	ENSG00000211962; ENSG00000282131		Initial triggering of complement; Classical antibody-mediated complement activation; Immunoregulatory interactions between a Lymphoid and a non-Lymphoid cell; Cell surface interactions at the vascular wall; FCGR activation; Regulation of actin dynamics for phagocytic cup formation; Role of phospholipids in phagocytosis; Scavenging of heme from plasma; Role of LAT2/NTAL/LAB on calcium mobilization…
P02792	FTL	-1.09232	0.33327	Not Significant	Ferritin light chain [OS=Homo sapiens]	transport;other biological processes	non-structural extracellular;cytosol;other cytoplasmic organelle;other cell component	other molecular function	Pf00210	2512	B2R4B9; hsa:2512; P02792; Q6IBT7; Q7Z2W1; Q86WI9; Q8WU07; Q96AU9; Q96CU0; Q9BTZ8	ENSG00000087086	Nuclear receptors meta-pathway; NRF2 pathway; Ferroptosis; Neurodegeneration with brain iron accumulation (NBIA) subtypes pathway	Neutrophil degranulation; Iron uptake and transport; Scavenging by Class A Receptors; Golgi Associated Vesicle Biogenesis
P48637	GSS	-1.09594	0.155474	Not Significant	Glutathione synthetase [OS=Homo sapiens]	other metabolic processes;stress response;developmental processes;other biological processes	cytosol	other molecular function	Pf03199, Pf03917	2937	B2R697; B6F210; E1P5P9; hsa:2937; P48637; Q4TTD9	ENSG00000100983	Glutathione metabolism; Trans-sulfuration and one-carbon metabolism; Amino acid metabolism; One-carbon metabolism and related pathways; Ferroptosis; Gamma-glutamyl cycle for the biosynthesis and degradation of glutathione, including diseases; Metapathway biotransformation Phase I and II	Glutathione synthesis and recycling; Defective GSS causes GSS deficiency
P02763	ORM1	-1.09824	0.254026	Not Significant	Alpha-1-acid glycoprotein 1 [OS=Homo sapiens]	stress response;other biological processes	non-structural extracellular;other cell component		Pf00061	5004	B7ZKQ5; hsa:5004; P02763; Q5T539; Q5U067; Q8TC16	ENSG00000229314	Vitamin D receptor pathway	Neutrophil degranulation; Platelet degranulation
A0A075B6I1	IGLV4-60	-1.10042	0.433952	Not Significant	Immunoglobulin lambda variable 4-60 [OS=Homo sapiens]	other biological processes	non-structural extracellular;plasma membrane;other membranes;other cell component		Pf07686		A0A075B6I1	ENSG00000211639
P23142	FBLN1	-1.1025	0.133862	Not Significant	Fibulin-1 [OS=Homo sapiens]	cell organization and biogenesis;protein metabolism;other metabolic processes;stress response;developmental processes;other biological processes	non-structural extracellular;extracellular matrix	signal transduction activity or receptor binding;enzyme regulator activity;extracellular structural activity;other molecular function	Pf07645, Pf12662	2192	B0QY42; B1AHL4; hsa:2192; P23142; P23143; P23144; P37888; Q5TIC4; Q8TBH8; Q9HBQ5; Q9UC21; Q9UGR4; Q9UH41	ENSG00000077942		Molecules associated with elastic fibres
P10643	C7	-1.10962	0.230225	Not Significant	Complement component C7 [OS=Homo sapiens]	stress response;other biological processes	non-structural extracellular;plasma membrane;other membranes		Pf00057, Pf00084, Pf00090, Pf01823, Pf18434	730	A8K2T4; hsa:730; P10643; Q6P3T5; Q92489	ENSG00000112936	Allograft Rejection; Complement system; Cells and molecules involved in local acute inflammatory response ; Complement system in neuronal development and plasticity; Complement activation; Complement and coagulation cascades	Regulation of Complement cascade; Terminal pathway of complement
P07359	GP1BA	-1.10979	0.19168	Not Significant	Platelet glycoprotein Ib alpha chain [OS=Homo sapiens]	cell adhesion;stress response;signal transduction;other biological processes	non-structural extracellular;extracellular matrix;plasma membrane;other membranes	other molecular function	Pf01462, Pf13855	2811	E7ES66; hsa:2811; P07359; Q14441; Q16469; Q8N1F3; Q8NG39; Q9HDC7; Q9UEK1; Q9UQS4	ENSG00000185245	22q11.2 copy number variation syndrome	Intrinsic Pathway of Fibrin Clot Formation; Platelet Aggregation (Plug Formation); Defective F9 activation; Platelet Adhesion to exposed collagen; GP1b-IX-V activation signalling; RUNX1 regulates genes involved in megakaryocyte differentiation and platelet function
P04070	PROC	-1.11766	0.179281	Not Significant	Vitamin K-dependent protein C [OS=Homo sapiens]	protein metabolism;stress response;other biological processes	non-structural extracellular;ER/Golgi	other molecular function	Pf00008, Pf00089, Pf00594, Pf14670	5624	B4DPQ7; hsa:5624; P04070; Q15189; Q15190; Q16001; Q53S74; Q9UC55	ENSG00000115718	Complement and coagulation cascades	Cell surface interactions at the vascular wall; Regulation of Insulin-like Growth Factor (IGF) transport and uptake by Insulin-like Growth Factor Binding Proteins (IGFBPs); Post-translational protein phosphorylation; Common Pathway of Fibrin Clot Formation; Intrinsic Pathway of Fibrin Clot Formation; Gamma-carboxylation of protein precursors; Transport of gamma-carboxylated protein precursors fro…
P07237	P4HB	-1.11818	0.190156	Not Significant	Protein disulfide-isomerase [OS=Homo sapiens]	protein metabolism;other metabolic processes;stress response;signal transduction;other biological processes	non-structural extracellular;plasma membrane;other membranes;cytosol;cytoskeleton;ER/Golgi;other cell component	signal transduction activity or receptor binding;cytoskeletal activity;other molecular function	Pf00085, Pf13848	5034	B2RDQ2; hsa:5034; P07237; P30037; P32079; Q15205; Q6LDE5	ENSG00000185624	VEGFA-VEGFR2 signaling pathway; Type I collagen synthesis in the context of osteogenesis imperfecta	Regulation of Insulin-like Growth Factor (IGF) transport and uptake by Insulin-like Growth Factor Binding Proteins (IGFBPs); Post-translational protein phosphorylation; Chylomicron assembly; VLDL assembly; LDL remodeling; Hedgehog ligand biogenesis; Collagen biosynthesis and modifying enzymes; Detoxification of Reactive Oxygen Species; Interleukin-12 signaling; Interleukin-23 signaling
P06276	BCHE	-1.1216	0.144283	Not Significant	Cholinesterase [OS=Homo sapiens]	other metabolic processes;developmental processes;other biological processes	non-structural extracellular;other membranes;ER/Golgi;nucleus	other molecular function	Pf00135, Pf08674	590	A8K7P8; hsa:590; P06276	ENSG00000114200	Irinotecan pathway; Heroin metabolism	Neurotransmitter clearance; Synthesis, secretion, and deacylation of Ghrelin; Synthesis of PC
P08185	SERPINA6	-1.12262	0.125151	Not Significant	Corticosteroid-binding globulin [OS=Homo sapiens]	other metabolic processes;other biological processes	non-structural extracellular	enzyme regulator activity;other molecular function	Pf00079	866	A8K456; hsa:866; P08185; Q7Z2Q9	ENSG00000170099; ENSG00000277405		Glucocorticoid biosynthesis
P07225	PROS1	-1.12626	0.0945651	Not Significant	Vitamin K-dependent protein S [OS=Homo sapiens]	stress response;other biological processes	non-structural extracellular;plasma membrane;other membranes;ER/Golgi;other cell component	enzyme regulator activity;other molecular function	Pf00008, Pf00054, Pf00594, Pf02210, Pf07645, Pf14670	5627	A8KAC9; D3DN28; hsa:5627; P07225; Q15518; Q7Z715; Q9UCZ8	ENSG00000184500	Complement system; Complement system in neuronal development and plasticity; Complement and coagulation cascades	Cell surface interactions at the vascular wall; Regulation of Complement cascade; Platelet degranulation ; Common Pathway of Fibrin Clot Formation; Intrinsic Pathway of Fibrin Clot Formation; Gamma-carboxylation of protein precursors; Transport of gamma-carboxylated protein precursors from the endoplasmic reticulum to the Golgi apparatus; Removal of aminoterminal propeptides from gamma-carboxylat…
P20742	PZP	-1.12913	0.427096	Not Significant	Pregnancy zone protein [OS=Homo sapiens]	other biological processes	non-structural extracellular	enzyme regulator activity;other molecular function	Pf00207, Pf01835, Pf07677, Pf07678, Pf07703, Pf17789, Pf17791		A6ND27; P20742; Q15273; Q2NKL2; Q7M4N7	ENSG00000126838
Q13103	SPP2	-1.13672	0.0478566	Not Significant	Secreted phosphoprotein 24 [OS=Homo sapiens]	developmental processes;other biological processes	non-structural extracellular;ER/Golgi;other cell component	enzyme regulator activity	Pf07448	6694	A4QMV3; hsa:6694; Q13103; Q3B892; Q546M5	ENSG00000072080		Regulation of Insulin-like Growth Factor (IGF) transport and uptake by Insulin-like Growth Factor Binding Proteins (IGFBPs); Post-translational protein phosphorylation; Platelet degranulation
P12955	PEPD	-1.13678	0.0987723	Not Significant	Xaa-Pro dipeptidase [OS=Homo sapiens]	protein metabolism;other metabolic processes		other molecular function	Pf00557, Pf05195	5184	A8K3Z1; A8K416; A8K696; A8MX47; B4DDB7; B4DGJ1; E9PCE8; hsa:5184; P12955; Q8TBN9; Q9BT75	ENSG00000124299
P08697	SERPINF2	-1.14243	0.047717	Not Significant	Alpha-2-antiplasmin [OS=Homo sapiens]	cell organization and biogenesis;stress response;developmental processes;other biological processes	non-structural extracellular;other cell component	enzyme regulator activity;other molecular function	Pf00079	5345	B4E1B7; hsa:5345; P08697; Q8N5U7; Q9UCG2; Q9UCG3	ENSG00000167711; ENSG00000276838	Blood clotting cascade; Complement and coagulation cascades	Platelet degranulation ; Dissolution of Fibrin Clot
P14314	PRKCSH	-1.15228	0.0310539	Not Significant	Glucosidase 2 subunit beta [OS=Homo sapiens]	protein metabolism;other metabolic processes;developmental processes;signal transduction	ER/Golgi;other cell component	other molecular function	Pf12999, Pf13015, Pf13202	5589	A8K318; hsa:5589; P14314; Q96BU9; Q96D06; Q9P0W9	ENSG00000130175		Regulation of Insulin-like Growth Factor (IGF) transport and uptake by Insulin-like Growth Factor Binding Proteins (IGFBPs); Post-translational protein phosphorylation; Advanced glycosylation endproduct receptor signaling; Maturation of spike protein; Calnexin/calreticulin cycle; Maturation of spike protein
P01019	AGT	-1.15396	0.153712	Not Significant	Angiotensinogen [OS=Homo sapiens]	cell-cell signaling;cell cycle OR cell proliferation;cell organization and biogenesis;stress response;transport;developmental processes;signal transduction;other biological processes	non-structural extracellular;cytosol	signal transduction activity or receptor binding;enzyme regulator activity;other molecular function	Pf00079	183	P01019; Q16358; Q16359; Q96F91	ENSG00000135744	Physiological and pathological hypertrophy of the heart; MicroRNAs in cardiomyocyte hypertrophy; Adipogenesis; IL-6 signaling pathway; Renin-angiotensin-aldosterone system (RAAS); SARS-CoV-2 and angiotensin-converting enzyme 2 receptor: molecular mechanisms; COVID-19 adverse outcome pathway; RAS and bradykinin pathways in COVID-19; ACE inhibitor pathway; Monoamine transport	G alpha (q) signalling events; Peptide ligand-binding receptors; PPARA activates gene expression; G alpha (i) signalling events; Metabolism of Angiotensinogen to Angiotensins
Q92496	CFHR4	-1.15491	0.117321	Not Significant	Complement factor H-related protein 4 [OS=Homo sapiens]	transport	non-structural extracellular	transporter activity	Pf00084	10877	A8K9N7; B1ALQ9; C9J7J7; hsa:10877; Q5DVJ7; Q92496; Q9UJY6	ENSG00000134365	Complement system	Regulation of Complement cascade
Q15848	ADIPOQ	-1.15497	0.15327	Not Significant	Adiponectin [OS=Homo sapiens]	other metabolic processes;stress response;signal transduction;other biological processes	non-structural extracellular;ER/Golgi;other cell component	signal transduction activity or receptor binding;other molecular function	Pf00386, Pf01391	9370	hsa:9370; Q15848; Q58EX9	ENSG00000181092	AMP-activated protein kinase (AMPK) signaling; Type II diabetes mellitus; Adipogenesis; Complement system; Differentiation of white and brown adipocyte; Transcription factor regulation in adipogenesis; Leptin and adiponectin; PPAR signaling pathway; Nonalcoholic fatty liver disease; IL-18 signaling pathway; Galanin receptor pathway; Orexin receptor pathway	Transcriptional regulation of white adipocyte differentiation; AMPK inhibits chREBP transcriptional activation activity
P02647	APOA1	-1.15822	0.0735631	Not Significant	Apolipoprotein A-I [OS=Homo sapiens]	cell cycle OR cell proliferation;cell organization and biogenesis;protein metabolism;other metabolic processes;stress response;transport;developmental processes;signal transduction;other biological processes	non-structural extracellular;plasma membrane;other membranes;cytosol;ER/Golgi;nucleus;other cytoplasmic organelle;other cell component	signal transduction activity or receptor binding;transporter activity;enzyme regulator activity;other molecular function	Pf01442	335	A8K866; hsa:335; P02647; Q6LDN9; Q6Q785; Q9UCS8; Q9UCT8	ENSG00000118137	Selenium micronutrient network; Vitamin B12 metabolism; Folate metabolism; Complement system; PPAR-alpha pathway; Nuclear receptors meta-pathway; PPAR signaling pathway; Statin inhibition of cholesterol production; Familial hyperlipidemia type 1; Familial hyperlipidemia type 2; Familial hyperlipidemia type 3; Familial hyperlipidemia type 4; Familial hyperlipidemia type 5	Scavenging of heme from plasma; Regulation of Insulin-like Growth Factor (IGF) transport and uptake by Insulin-like Growth Factor Binding Proteins (IGFBPs); Post-translational protein phosphorylation; Retinoid metabolism and transport; Platelet degranulation ; PPARA activates gene expression; HDL assembly; Amyloid fiber formation; Scavenging by Class B Receptors; Heme signaling; HDL clearance; De…
P04278	SHBG	-1.15892	0.0810615	Not Significant	Sex hormone-binding globulin [OS=Homo sapiens]		non-structural extracellular	other molecular function	Pf00054	6462	B0FWH4; E9PGW1; F5H5Z8; hsa:6462; I3L1N7; P04278; P14689; Q16616; Q3MIL0; Q6ISD2	ENSG00000129214
P07996	THBS1	-1.16015	0.26837	Not Significant	Thrombospondin-1 [OS=Homo sapiens]	cell adhesion;cell organization and biogenesis;protein metabolism;other metabolic processes;stress response;transport;developmental processes;other biological processes	non-structural extracellular;extracellular matrix;plasma membrane;other membranes;cytosol;ER/Golgi;other cell component	signal transduction activity or receptor binding;other molecular function	Pf00090, Pf00093, Pf02412, Pf05735	7057	A8K6H4; B4E3J7; B9EGH6; hsa:7057; P07996; Q15667; Q59E99	ENSG00000137801	Complement system; Bladder cancer; Apoptosis-related network due to altered Notch3 in ovarian cancer; miRNA targets in ECM and membrane receptors; Focal adhesion; TGF-beta signaling pathway; Focal adhesion: PI3K-Akt-mTOR-signaling pathway; PI3K-Akt signaling pathway; Inflammatory response pathway; Male infertility; TGF-beta receptor signaling in skeletal dysplasias; p53 transcriptional gene netwo…	Platelet degranulation ; Signaling by PDGF; Integrin cell surface interactions; Syndecan interactions; RUNX1 regulates genes involved in megakaryocyte differentiation and platelet function; Defective B3GALTL causes PpS; O-glycosylation of TSR domain-containing proteins
P02774	GC	-1.16102	0.0344519	Not Significant	Vitamin D-binding protein [OS=Homo sapiens]	other metabolic processes;transport	non-structural extracellular;cytosol;other cytoplasmic organelle;other cell component	transporter activity;cytoskeletal activity;other molecular function	Pf00273, Pf09164	2638	B4DPP2; D6RAK8; hsa:2638; P02774; Q16309; Q16310; Q53F31; Q6GTG1	ENSG00000145321	Vitamin D metabolism	Vitamin D (calciferol) metabolism
P02787	TF	-1.16359	0.0502629	Not Significant	Serotransferrin [OS=Homo sapiens]	cell organization and biogenesis;stress response;transport;developmental processes;signal transduction;other biological processes	non-structural extracellular;plasma membrane;other membranes;ER/Golgi;other cytoplasmic organelle;other cell component	signal transduction activity or receptor binding;other molecular function	Pf00405	7018	hsa:7018; O43890; P02787; Q1HBA5; Q9NQB8; Q9UHV0	ENSG00000091513	Iron metabolism in placenta; Pluripotent stem cell differentiation pathway; Ferroptosis; IL-18 signaling pathway; 3q29 copy number variation syndrome; Sudden infant death syndrome (SIDS) susceptibility pathways	Regulation of Insulin-like Growth Factor (IGF) transport and uptake by Insulin-like Growth Factor Binding Proteins (IGFBPs); Post-translational protein phosphorylation; Platelet degranulation ; Cargo recognition for clathrin-mediated endocytosis; Transferrin endocytosis and recycling
P04406	GAPDH	-1.16464	0.0887041	Not Significant	Glyceraldehyde-3-phosphate dehydrogenase [OS=Homo sapiens]	cell organization and biogenesis;protein metabolism;other metabolic processes;stress response;other biological processes	plasma membrane;other membranes;cytosol;cytoskeleton;nucleus;other cell component	enzyme regulator activity;cytoskeletal activity;other molecular function	Pf00044, Pf02800	2597	E7EUT4; hsa:2597; P00354; P04406; Q53X65	ENSG00000111640	Cori cycle; Alzheimer's disease and miRNA effects; HIF1A and PPARG regulation of glycolysis; VEGFA-VEGFR2 signaling pathway; Clear cell renal cell carcinoma pathways; Metabolic reprogramming in colon cancer; Aerobic glycolysis; 7q11.23 copy number variation syndrome; Glycolysis in senescence; Alzheimer's disease; Glycolysis and gluconeogenesis; Sudden infant death syndrome (SIDS) susceptibility p…	Glycolysis; Gluconeogenesis
P01009	SERPINA1	-1.16571	0.0692532	Not Significant	Alpha-1-antitrypsin [OS=Homo sapiens]	stress response;other biological processes	non-structural extracellular;other membranes;ER/Golgi;other cell component	enzyme regulator activity;other molecular function	Pf00079	5265	A6PX14; B2RDQ8; hsa:5265; P01009; Q0PVP5; Q13672; Q53XB8; Q5U0M1; Q7M4R2; Q86U18; Q86U19; Q96BF9; Q96ES1; Q9P1P0; Q9UCE6; Q9UCM3	ENSG00000197249	Nuclear receptors meta-pathway; NRF2 pathway; Lung fibrosis; Lung fibrosis; Complement and coagulation cascades	Regulation of Insulin-like Growth Factor (IGF) transport and uptake by Insulin-like Growth Factor Binding Proteins (IGFBPs); Post-translational protein phosphorylation; Neutrophil degranulation; Platelet degranulation ; COPII-mediated vesicle transport; Cargo concentration in the ER
P05452	CLEC3B	-1.16666	0.0833016	Not Significant	Tetranectin [OS=Homo sapiens]	developmental processes;other biological processes	non-structural extracellular;nucleus;other cell component	other molecular function	Pf00059	7123	hsa:7123; P05452; Q6FGX6	ENSG00000163815		Platelet degranulation
P04217	A1BG	-1.16857	0.0448297	Not Significant	Alpha-1B-glycoprotein [OS=Homo sapiens]		non-structural extracellular;other cell component		Pf13895	1	A8K052; hsa:1; P04217; Q68CK0; Q8IYJ6; Q96P39	ENSG00000121410	Network map of SARS-CoV-2 signaling pathway	Neutrophil degranulation; Platelet degranulation
P48740-2	MASP1	-1.16976	0.0260891	Not Significant	Isoform 2 of Mannan-binding lectin serine protease 1 [OS=Homo sapiens]						P48740-2
Q9UNN8	PROCR	-1.17248	0.0536244	Not Significant	Endothelial protein C receptor [OS=Homo sapiens]	stress response;other biological processes	non-structural extracellular;plasma membrane;other membranes;cytoskeleton;other cell component	other molecular function	Pf16497	10544	B2RC04; hsa:10544; Q14218; Q6IB56; Q96CB3; Q9ULX1; Q9UNN8	ENSG00000101000		Cell surface interactions at the vascular wall; Common Pathway of Fibrin Clot Formation
P15151	PVR	-1.17259	0.0276833	Not Significant	Poliovirus receptor [OS=Homo sapiens]	cell adhesion;other biological processes	non-structural extracellular;plasma membrane;other membranes;other cell component	other molecular function	Pf07686, Pf08205	5817	B4DTS9; hsa:5817; P15151; P15152; Q15267; Q15268; Q96BJ1	ENSG00000073008	Interactions of natural killer cells in pancreatic cancer	Immunoregulatory interactions between a Lymphoid and a non-Lymphoid cell; Nectin/Necl trans heterodimerization
P09172	DBH	-1.17488	0.201947	Not Significant	Dopamine beta-hydroxylase [OS=Homo sapiens]	cell-cell signaling;other metabolic processes;stress response;other biological processes	non-structural extracellular;other membranes;cytoskeleton;ER/Golgi;other cell component	other molecular function	Pf01082, Pf03351, Pf03712	1621	hsa:1621; P09172; Q5T381; Q96AG2	ENSG00000123454	Amino acid metabolism; Biogenic amine synthesis; Monoamine transport	Catecholamine biosynthesis
P02750	LRG1	-1.1791	0.0557254	Not Significant	Leucine-rich alpha-2-glycoprotein [OS=Homo sapiens]	other biological processes	non-structural extracellular;other membranes;other cell component	signal transduction activity or receptor binding	Pf13855	116844	hsa:116844; P02750; Q8N4F5; Q96QZ4	ENSG00000171236	Network map of SARS-CoV-2 signaling pathway	Neutrophil degranulation
Q15582	TGFBI	-1.18428	0.0246249	Not Significant	Transforming growth factor-beta-induced protein ig-h3 [OS=Homo sapiens]	cell adhesion;cell cycle OR cell proliferation;cell organization and biogenesis;developmental processes;other biological processes	non-structural extracellular;extracellular matrix;plasma membrane;other membranes;ER/Golgi	signal transduction activity or receptor binding;extracellular structural activity;other molecular function	Pf02469	7045	D3DQB1; hsa:7045; O14471; O14472; O14476; O43216; O43217; O43218; O43219; Q15582; Q53XM1	ENSG00000120708		Amyloid fiber formation
P00488	F13A1	-1.1844	0.0524244	Not Significant	Coagulation factor XIII A chain [OS=Homo sapiens]	protein metabolism;other metabolic processes;stress response	non-structural extracellular;other cell component	other molecular function	Pf00868, Pf00927, Pf01841	2162	hsa:2162; P00488; Q59HA7; Q8N6X2; Q96P24; Q9BX29	ENSG00000124491	Complement system	Platelet degranulation ; Interleukin-4 and Interleukin-13 signaling; Common Pathway of Fibrin Clot Formation
P05543	SERPINA7	-1.18878	0.013033	Not Significant	Thyroxine-binding globulin [OS=Homo sapiens]	transport;other biological processes	non-structural extracellular	enzyme regulator activity	Pf00079	6906	D3DUX1; hsa:6906; P05543	ENSG00000123561
Q9NZP8	C1RL	-1.18969	0.0102967	Not Significant	Complement C1r subcomponent-like protein [OS=Homo sapiens]	protein metabolism;other metabolic processes;stress response;other biological processes	non-structural extracellular	other molecular function	Pf00089, Pf00431	51279	hsa:51279; Q53GX9; Q9NZP8	ENSG00000139178; ENSG00000288124
P18206	VCL	-1.19031	0.0783623	Not Significant	Vinculin [OS=Homo sapiens]	cell adhesion;cell organization and biogenesis;developmental processes;other biological processes	non-structural extracellular;plasma membrane;other membranes;cytosol;cytoskeleton;other cell component	cytoskeletal activity;other molecular function	Pf01044	7414	hsa:7414; P18206; Q16450; Q5SWX2; Q7Z3B8; Q8IXU7	ENSG00000035403	Integrin-mediated cell adhesion; Primary focal segmental glomerulosclerosis (FSGS); Focal adhesion; VEGFA-VEGFR2 signaling pathway; MFAP5 effect on permeability and motility of endothelial cells via cytoskeleton rearrangement; Melanoma; Regulation of actin cytoskeleton	Neutrophil degranulation; Platelet degranulation ; Signaling by BRAF and RAF1 fusions; Signaling by moderate kinase activity BRAF mutants; Paradoxical activation of RAF signaling by kinase inactive BRAF; Signaling downstream of RAS mutants; Signaling by RAF1 mutants; MAP2K and MAPK activation; Signaling by high-kinase activity BRAF mutants; Signaling by ALK fusions and activated point mutants; Sm…
P14151	SELL	-1.19334	0.0271975	Not Significant	L-selectin [OS=Homo sapiens]	cell adhesion	plasma membrane;other membranes	other molecular function	Pf00059, Pf00084	6402	A0A024R8Z0; B2R6Q8; hsa:6402; P14151; P15023; Q9UJ43	ENSG00000188404	Complement system	Immunoregulatory interactions between a Lymphoid and a non-Lymphoid cell; Cell surface interactions at the vascular wall; Neutrophil degranulation
P22105	TNXB	-1.20041	0.0389839	Not Significant	Tenascin-X [OS=Homo sapiens]	cell adhesion;cell organization and biogenesis;other metabolic processes;other biological processes	extracellular matrix	signal transduction activity or receptor binding;extracellular structural activity;other molecular function	Pf00041, Pf00147, Pf07974, Pf18720	7148	hsa:7148; P22105; P78530; P78531; Q08424; Q08AM0; Q08AM1; Q59GU7; Q5SQD3; Q5ST74; Q7L8Q4; Q8N4R1; Q9NPK9; Q9UC10; Q9UC11; Q9UC12; Q9UC13; Q9UMG7	ENSG00000168477; ENSG00000229353; ENSG00000236236	miRNA targets in ECM and membrane receptors; Focal adhesion; VEGFA-VEGFR2 signaling pathway; Focal adhesion: PI3K-Akt-mTOR-signaling pathway; PI3K-Akt signaling pathway	ECM proteoglycans
Q16473	TNXA	-1.20041	0.0389839	Not Significant	Putative tenascin-XA [OS=Homo sapiens]	cell organization and biogenesis	extracellular matrix		Pf00041		Q16473
P15144	ANPEP	-1.20379	0.0114847	Not Significant	Aminopeptidase N [OS=Homo sapiens]	protein metabolism;other metabolic processes;developmental processes;signal transduction;other biological processes	non-structural extracellular;plasma membrane;other membranes;ER/Golgi;other cell component	other molecular function	Pf01433, Pf11838, Pf17900	290	hsa:290; P15144; Q16728; Q6GT90; Q8IUK3; Q8IVH3; Q9UCE0	ENSG00000166825	Glutathione metabolism; Cardiac progenitor differentiation	Neutrophil degranulation; Metabolism of Angiotensinogen to Angiotensins
P22891	PROZ	-1.20393	0.0554592	Not Significant	Vitamin K-dependent protein Z [OS=Homo sapiens]	protein metabolism;stress response	non-structural extracellular;ER/Golgi	other molecular function	Pf00008, Pf00089, Pf00594	8858	A6NMB4; hsa:8858; P22891; Q15213; Q5JVF5; Q5JVF6	ENSG00000126231		Gamma-carboxylation of protein precursors; Transport of gamma-carboxylated protein precursors from the endoplasmic reticulum to the Golgi apparatus; Removal of aminoterminal propeptides from gamma-carboxylated proteins
Q01459	CTBS	-1.20504	0.0140044	Not Significant	Di-N-acetylchitobiase [OS=Homo sapiens]	other metabolic processes	other cytoplasmic organelle	other molecular function	Pf00704	1486	hsa:1486; Q01459; Q5VX50	ENSG00000117151
P01833	PIGR	-1.20865	0.0153451	Not Significant	Polymeric immunoglobulin receptor [OS=Homo sapiens]	transport;signal transduction;other biological processes	non-structural extracellular;plasma membrane;other membranes;other cytoplasmic organelle;other cell component	other molecular function	Pf07686	5284	hsa:5284; P01833; Q68D81; Q8IZY7	ENSG00000162896		Neutrophil degranulation
Q15166	PON3	-1.21466	0.0241138	Not Significant	Serum paraoxonase/lactonase 3 [OS=Homo sapiens]	other metabolic processes;other biological processes	non-structural extracellular;other cell component	other molecular function	Pf01731	5446	A4D1H8; hsa:5446; O75855; O76060; Q15166; Q6IRU9; Q8IX97; Q9BZH9	ENSG00000105852	Phase I biotransformations, non P450	Synthesis of 5-eicosatetraenoic acids
P00450	CP	-1.21681	0.00984007	Not Significant	Ceruloplasmin [OS=Homo sapiens]	transport;other biological processes	non-structural extracellular;plasma membrane;other membranes;ER/Golgi	other molecular function	Pf00394, Pf07731, Pf07732	1356	hsa:1356; P00450; Q14063; Q2PP18; Q9UKS4	ENSG00000047457	Ferroptosis; Neurodegeneration with brain iron accumulation (NBIA) subtypes pathway	Regulation of Insulin-like Growth Factor (IGF) transport and uptake by Insulin-like Growth Factor Binding Proteins (IGFBPs); Post-translational protein phosphorylation; Metal ion SLC transporters; Iron uptake and transport; Defective SLC40A1 causes hemochromatosis 4 (HFE4) (macrophages); Defective CP causes aceruloplasminemia (ACERULOP)
P43251	BTD	-1.2191	0.00846311	Not Significant	Biotinidase [OS=Homo sapiens]	other metabolic processes;developmental processes	non-structural extracellular;mitochondrion	other molecular function	Pf00795, Pf19018	686	A6NHF2; B2R865; B4DFX1; B4DLJ9; B7Z7C9; F8W1Q3; hsa:686; P43251; Q96EM9	ENSG00000169814		Biotin transport and metabolism; Defective BTD causes biotidinase deficiency
O00187	MASP2	-1.22225	0.00389662	Not Significant	Mannan-binding lectin serine protease 2 [OS=Homo sapiens]	protein metabolism;stress response;other biological processes	non-structural extracellular	other molecular function	Pf00084, Pf00089, Pf00431, Pf07645	10747	A8K458; A8MWJ2; hsa:10747; O00187; O75754; Q5TEQ5; Q5TER0; Q96QG4; Q9BZH0; Q9H498; Q9H499; Q9UBP3; Q9UC48; Q9ULC7; Q9UMV3; Q9Y270	ENSG00000009724	Complement system; Complement system in neuronal development and plasticity; Complement activation; Complement and coagulation cascades
Q14624	ITIH4	-1.22302	0.111568	Not Significant	Inter-alpha-trypsin inhibitor heavy chain H4 [OS=Homo sapiens]	other metabolic processes;stress response;other biological processes	non-structural extracellular;plasma membrane;other membranes;other cell component	enzyme regulator activity	Pf00092, Pf06668, Pf08487	3700	B7Z545; E9PGN5; hsa:3700; Q14624; Q15135; Q9P190; Q9UQ54	ENSG00000055955	Network map of SARS-CoV-2 signaling pathway	Platelet degranulation
P98160	HSPG2	-1.22421	0.00108887	Not Significant	Basement membrane-specific heparan sulfate proteoglycan core protein [OS=Homo sapiens]	other metabolic processes;stress response;transport;developmental processes;other biological processes	extracellular matrix;plasma membrane;other membranes;ER/Golgi;other cytoplasmic organelle	signal transduction activity or receptor binding;extracellular structural activity;other molecular function	Pf00008, Pf00052, Pf00053, Pf00054, Pf00057, Pf02210, Pf07679, Pf13927	3339	hsa:3339; P98160; Q16287; Q5SZI3; Q9H3V5	ENSG00000142798	Hepatitis B infection	Retinoid metabolism and transport; Degradation of the extracellular matrix; Amyloid fiber formation; Integrin cell surface interactions; Non-integrin membrane-ECM interactions; ECM proteoglycans; Laminin interactions; HS-GAG degradation; A tetrasaccharide linker sequence is required for GAG synthesis; HS-GAG biosynthesis; Defective B4GALT7 causes EDS, progeroid type; Defective B3GAT3 causes JDSSD…
P08571	CD14	-1.22437	0.00332008	Not Significant	Monocyte differentiation antigen CD14 [OS=Homo sapiens]	stress response;transport;signal transduction;other biological processes	non-structural extracellular;plasma membrane;other membranes;ER/Golgi;other cytoplasmic organelle	other molecular function		929	hsa:929; P08571; Q53XT5; Q96FR6; Q96L99; Q9UNS3	ENSG00000170458	Regulation of toll-like receptor signaling pathway; Pathogenic Escherichia coli infection; Vitamin D receptor pathway; MAPK signaling pathway; Fibrin complement receptor 3 signaling pathway; Macrophage markers; Regulation of actin cytoskeleton; Network map of SARS-CoV-2 signaling pathway; Toll-like receptor signaling pathway	Neutrophil degranulation; ER-Phagosome pathway; MyD88:MAL(TIRAP) cascade initiated on plasma membrane; MyD88 deficiency (TLR2/4); IRAK4 deficiency (TLR2/4); Regulation of TLR by endogenous ligand; Caspase activation via Death Receptors in the presence of ligand; MyD88-independent TLR4 cascade ; TRIF-mediated programmed cell death; Activation of IRF3/IRF7 mediated by TBK1/IKK epsilon; IKK complex …
Q92954-3	PRG4	-1.22558	0.0365233	Not Significant	Isoform C of Proteoglycan 4 [OS=Homo sapiens]						Q92954-3
P07339	CTSD	-1.22786	0.00324426	Not Significant	Cathepsin D [OS=Homo sapiens]	protein metabolism;other metabolic processes;other biological processes	other membranes;other cytoplasmic organelle;other cell component	other molecular function	Pf00026, Pf07966	1509	hsa:1509; P07339; Q6IB57	ENSG00000117984	Prolactin signaling pathway	Neutrophil degranulation; Metabolism of Angiotensinogen to Angiotensins; MHC class II antigen presentation; Collagen degradation; Estrogen-dependent gene expression
Q14697	GANAB	-1.22931	0.0211836	Not Significant	Neutral alpha-glucosidase AB [OS=Homo sapiens]	protein metabolism;other metabolic processes	ER/Golgi;other cell component	other molecular function	Pf01055, Pf13802	23193	A6NC20; hsa:23193; Q14697; Q8WTS9; Q9P0X0	ENSG00000089597		Maturation of spike protein; Calnexin/calreticulin cycle; Maturation of spike protein
P01042-2	KNG1	-1.23133	0.0672957	Not Significant	Isoform LMW of Kininogen-1 [OS=Homo sapiens]						P01042-2
P23470	PTPRG	-1.23595	0.00710012	Not Significant	Receptor-type tyrosine-protein phosphatase gamma [OS=Homo sapiens]	protein metabolism;other metabolic processes;developmental processes;signal transduction;other biological processes	plasma membrane;other membranes	other molecular function	Pf00041, Pf00102, Pf00194	5793	B2RU12; B7ZLX5; hsa:5793; P23470; Q15623; Q59EE0; Q68DU5	ENSG00000144724
Q9NPH3	IL1RAP	-1.23954	0.0311206	Not Significant	Interleukin-1 receptor accessory protein [OS=Homo sapiens]	cell adhesion;cell-cell signaling;cell organization and biogenesis;stress response;signal transduction;other biological processes	non-structural extracellular;plasma membrane;other membranes;other cell component	signal transduction activity or receptor binding;other molecular function	Pf01582, Pf13927, Pf18452	3556	B1NLD0; D3DNW0; hsa:3556; O14915; Q86WJ7; Q9NPH3	ENSG00000196083	IL-1 signaling pathway; Interleukin-1 (IL-1) structural pathway; Signal transduction through IL1R
P19320	VCAM1	-1.24215	0.00684874	Not Significant	Vascular cell adhesion protein 1 [OS=Homo sapiens]	cell adhesion;other metabolic processes;stress response;developmental processes;signal transduction;other biological processes	non-structural extracellular;plasma membrane;other membranes;cytoskeleton;ER/Golgi;other cytoplasmic organelle;other cell component	signal transduction activity or receptor binding;other molecular function	Pf00047, Pf05790, Pf07679, Pf13927	7412	A8K6R7; B4DKS4; E9PDD1; hsa:7412; P19320; Q6NUP8	ENSG00000162692	RANKL/RANK signaling pathway; Photodynamic therapy-induced NF-kB survival signaling; Amplification and expansion of oncogenic pathways as metastatic traits; miRNAs involvement in the immune response in sepsis; Nonalcoholic fatty liver disease; Cells and molecules involved in local acute inflammatory response ; Netrin-UNC5B signaling pathway; CAMKK2 pathway; Orexin receptor pathway; CCL18 signalin…	Immunoregulatory interactions between a Lymphoid and a non-Lymphoid cell; Interleukin-4 and Interleukin-13 signaling; Integrin cell surface interactions; Interferon gamma signaling
Q96KN2	CNDP1	-1.24696	0.00568003	Not Significant	Beta-Ala-His dipeptidase [OS=Homo sapiens]	protein metabolism;other biological processes	non-structural extracellular;cytosol	other molecular function	Pf01546, Pf07687	84735	hsa:84735; Q14D40; Q17S05; Q2TBG0; Q6UWK2; Q96KN2; Q9BT98	ENSG00000150656
Q6UX71	PLXDC2	-1.24705	0.00078549	Not Significant	Plexin domain-containing protein 2 [OS=Homo sapiens]		other membranes		Pf01437	84898	hsa:84898; Q6UX71; Q96E59; Q96PD9; Q96SU9	ENSG00000120594
P54108	CRISP3	-1.24817	0.0254385	Not Significant	Cysteine-rich secretory protein 3 [OS=Homo sapiens]	stress response	non-structural extracellular;extracellular matrix;other cell component		Pf00188, Pf08562	10321	A8K9S1; B2R8I8; hsa:10321; P54108; Q15512; Q3MJ82; Q53FA9; Q5JW83; Q9H108	ENSG00000096006		Neutrophil degranulation
O00533	CHL1	-1.24956	0.00726772	Not Significant	Neural cell adhesion molecule L1-like protein [OS=Homo sapiens]	cell adhesion;cell organization and biogenesis;stress response;developmental processes;signal transduction	plasma membrane;other membranes		Pf00041, Pf00047, Pf07679, Pf13882, Pf13927	10752	B7ZL03; hsa:10752; O00533; Q2M3G2; Q59FY0	ENSG00000134121	Splicing factor NOVA regulated synaptic proteins	CHL1 interactions
O15394	NCAM2	-1.25135	0.00596384	Not Significant	Neural cell adhesion molecule 2 [OS=Homo sapiens]	cell adhesion;cell organization and biogenesis;developmental processes;other biological processes	plasma membrane;other membranes;nucleus;other cell component	other molecular function	Pf00041, Pf07679, Pf13927	4685	A8MQ06; B7Z841; hsa:4685; O15394; Q7Z7F2	ENSG00000154654
Q86VB7	CD163	-1.25162	0.0143298	Not Significant	Scavenger receptor cysteine-rich type 1 protein M130 [OS=Homo sapiens]	stress response;transport	non-structural extracellular;plasma membrane;other membranes;cytosol	other molecular function	Pf00530	9332	C9JIG2; hsa:9332; Q07898; Q07899; Q07900; Q07901; Q2VLH7; Q86VB7	ENSG00000177575	Macrophage markers	Scavenging of heme from plasma; CD163 mediating an anti-inflammatory response
Q9H4A9	DPEP2	-1.25258	0.00620272	Not Significant	Dipeptidase 2 [OS=Homo sapiens]	protein metabolism;other metabolic processes	other membranes	other molecular function	Pf01244	64174	A0A024R6Y5; B2RCF8; B3KS59; hsa:64174; I3L248; Q6UX92; Q8TC95; Q9H4A9	ENSG00000167261		Aflatoxin activation and detoxification; Synthesis of Leukotrienes (LT) and Eoxins (EX); LTC4-CYSLTR mediated IL4 production
P04180	LCAT	-1.25319	0.000853509	Not Significant	Phosphatidylcholine-sterol acyltransferase [OS=Homo sapiens]	cell organization and biogenesis;protein metabolism;other metabolic processes;transport;other biological processes	non-structural extracellular	other molecular function	Pf02450	3931	hsa:3931; P04180; Q53XQ3	ENSG00000213398	Lipid particles composition; Statin inhibition of cholesterol production; Metabolic pathway of LDL, HDL and TG, including diseases; Familial hyperlipidemia type 1; Familial hyperlipidemia type 2; Familial hyperlipidemia type 3; Familial hyperlipidemia type 4; Familial hyperlipidemia type 5	HDL remodeling
P49747	COMP	-1.25469	0.00258742	Not Significant	Cartilage oligomeric matrix protein [OS=Homo sapiens]	cell adhesion;cell cycle OR cell proliferation;cell organization and biogenesis;protein metabolism;other metabolic processes;stress response;transport;developmental processes;signal transduction;other biological processes	extracellular matrix;other cell component	signal transduction activity or receptor binding;extracellular structural activity;other molecular function	Pf02412, Pf05735, Pf07645, Pf11598	1311	B4DKJ3; hsa:1311; O14592; P49747; Q16388; Q16389; Q2NL86; Q8N4T2	ENSG00000105664	Focal adhesion; Focal adhesion: PI3K-Akt-mTOR-signaling pathway; PI3K-Akt signaling pathway; MED and pseudoachondroplasia genes	Integrin cell surface interactions; ECM proteoglycans
P06727	APOA4	-1.25522	0.066056	Not Significant	Apolipoprotein A-IV [OS=Homo sapiens]	cell adhesion;cell organization and biogenesis;protein metabolism;other metabolic processes;stress response;transport;other biological processes	non-structural extracellular;cytosol;ER/Golgi;other cytoplasmic organelle	transporter activity;enzyme regulator activity;other molecular function	Pf01442	337	A8MSL6; hsa:337; P06727; Q14CW8; Q6Q787	ENSG00000110244	Statin inhibition of cholesterol production; Familial hyperlipidemia type 1; Familial hyperlipidemia type 2; Familial hyperlipidemia type 3; Familial hyperlipidemia type 4; Familial hyperlipidemia type 5	Retinoid metabolism and transport; Amyloid fiber formation; Chylomicron assembly; Chylomicron remodeling; Assembly of active LPL and LIPC lipase complexes
P13591	NCAM1	-1.25616	0.00094792	Not Significant	Neural cell adhesion molecule 1 [OS=Homo sapiens]	cell adhesion;cell organization and biogenesis;developmental processes;other biological processes	non-structural extracellular;plasma membrane;other membranes;cytosol;ER/Golgi;other cell component	other molecular function	Pf00041, Pf07679, Pf13927	4684	A8K8T8; hsa:4684; P13591; P13592; P13593; Q05C58; Q15829; Q16180; Q16209; Q59FL7; Q86X47; Q96CJ3	ENSG00000149294	Brain-derived neurotrophic factor (BDNF) signaling pathway; Cardiac progenitor differentiation; Prion disease pathway	ECM proteoglycans; Interferon gamma signaling; RAF/MAP kinase cascade; NCAM1 interactions; Signal transduction by L1
P03952	KLKB1	-1.2567	0.0488887	Not Significant	Plasma kallikrein [OS=Homo sapiens]	protein metabolism;other metabolic processes;stress response;other biological processes	non-structural extracellular;plasma membrane;other membranes	other molecular function	Pf00024, Pf00089	3818	A6NH96; B2R8H9; hsa:3818; P03952; Q17RE8; Q17RE9; Q4W5C3	ENSG00000164344	Blood clotting cascade; Complement system; RAS and bradykinin pathways in COVID-19; Kinin-Kallikrein pathway; Complement and coagulation cascades	Intrinsic Pathway of Fibrin Clot Formation; Defective factor XII causes hereditary angioedema; Activation of Matrix Metalloproteinases; Defective SERPING1 causes hereditary angioedema
P31944	CASP14	-1.25798	0.0064701	Not Significant	Caspase-14 [OS=Homo sapiens]	protein metabolism;developmental processes;other biological processes	cytosol;cytoskeleton;mitochondrion;nucleus;other cell component	other molecular function	Pf00656	23581	hsa:23581; O95823; P31944; Q3SYC9	ENSG00000105141	Vitamin D receptor pathway	Formation of the cornified envelope
P27169	PON1	-1.26903	0.00401246	Not Significant	Serum paraoxonase/arylesterase 1 [OS=Homo sapiens]	other metabolic processes;other biological processes	non-structural extracellular;other cell component	other molecular function	Pf01731	5444	B2RA40; hsa:5444; P27169; Q16052; Q6B0J6; Q9UCB1	ENSG00000005421	Phase I biotransformations, non P450; Male infertility	Synthesis of 5-eicosatetraenoic acids
Q16853	AOC3	-1.26919	0.00324887	Not Significant	Membrane primary amine oxidase [OS=Homo sapiens]	cell adhesion;other metabolic processes;stress response;other biological processes	plasma membrane;other membranes;ER/Golgi;other cytoplasmic organelle;other cell component	other molecular function	Pf01179, Pf02727, Pf02728	8639	B2RCI5; hsa:8639; K7ESB3; L0L8N9; Q16853; Q45F94	ENSG00000131471	Amino acid metabolism	Phase I - Functionalization of compounds
P55290	CDH13	-1.27313	0.00311199	Not Significant	Cadherin-13 [OS=Homo sapiens]	cell adhesion;cell cycle OR cell proliferation;cell organization and biogenesis;developmental processes;signal transduction;other biological processes	non-structural extracellular;plasma membrane;other membranes;other cell component	other molecular function	Pf00028, Pf08758	1012	A8W476; A8W477; B7Z590; C9JRI6; hsa:1012; J3KN62; P55290; Q6GTW4; Q8TBX3	ENSG00000140945	Clear cell renal cell carcinoma pathways; Hippo signaling regulation pathways; Hippo-Merlin signaling dysregulation; Malignant pleural mesothelioma	Adherens junctions interactions
P12259	F5	-1.27525	0.0011508	Not Significant	Coagulation factor V [OS=Homo sapiens]	stress response;other biological processes	non-structural extracellular;plasma membrane;other membranes;ER/Golgi;other cell component	other molecular function	Pf00754, Pf07732	2153	A8K6E8; hsa:2153; P12259; Q14285; Q2EHR5; Q5R346; Q5R347; Q6UPU6; Q8WWQ6	ENSG00000198734	Blood clotting cascade; Complement and coagulation cascades	Regulation of Insulin-like Growth Factor (IGF) transport and uptake by Insulin-like Growth Factor Binding Proteins (IGFBPs); Post-translational protein phosphorylation; Platelet degranulation ; Common Pathway of Fibrin Clot Formation; COPII-mediated vesicle transport; Cargo concentration in the ER
Q9UGM5	FETUB	-1.28151	0.0046561	Not Significant	Fetuin-B [OS=Homo sapiens]	other biological processes	non-structural extracellular	enzyme regulator activity	Pf00031	26998	B2RCW6; E9PG06; hsa:26998; Q1RMZ0; Q5J876; Q6DK58; Q6GRB6; Q9UGM5; Q9Y6Z0	ENSG00000090512
P01023	A2M	-1.28292	0.0217197	Not Significant	Alpha-2-macroglobulin [OS=Homo sapiens]	other biological processes	non-structural extracellular;other cell component	signal transduction activity or receptor binding;enzyme regulator activity;other molecular function	Pf00207, Pf01835, Pf07677, Pf07678, Pf07703, Pf17789, Pf17791	2	hsa:2; P01023; Q13677; Q59F47; Q5QTS0; Q68DN2; Q6PIY3; Q6PN97	ENSG00000175899	Complement system; Complement and coagulation cascades	Platelet degranulation ; Intrinsic Pathway of Fibrin Clot Formation; Degradation of the extracellular matrix; HDL assembly
P11717	IGF2R	-1.28776	0.00145935	Not Significant	Cation-independent mannose-6-phosphate receptor [OS=Homo sapiens]	protein metabolism;other metabolic processes;transport;developmental processes;signal transduction;other biological processes	plasma membrane;other membranes;ER/Golgi;nucleus;other cytoplasmic organelle;other cell component	kinase activity;other molecular function	Pf00040, Pf00878	3482	hsa:3482; P11717; Q7Z7G9; Q96PT5	ENSG00000197081		Neutrophil degranulation; Golgi Associated Vesicle Biogenesis; Cargo recognition for clathrin-mediated endocytosis; Retrograde transport at the Trans-Golgi-Network
O95497	VNN1	-1.29625	0.0226165	Not Significant	Pantetheinase [OS=Homo sapiens]	cell adhesion;other metabolic processes;stress response;other biological processes	non-structural extracellular;plasma membrane;other membranes;other cytoplasmic organelle	other molecular function	Pf00795, Pf19018	8876	A8K310; hsa:8876; O95497; Q4JFW6; Q4VAS7; Q4VAS8; Q4VAS9; Q9UF16; Q9UJF4	ENSG00000112299		Post-translational modification: synthesis of GPI-anchored proteins; Neutrophil degranulation; Vitamin B5 (pantothenate) metabolism
Q9Y5Y7	LYVE1	-1.2975	0.00390542	Not Significant	Lymphatic vessel endothelial hyaluronic acid receptor 1 [OS=Homo sapiens]	cell adhesion;other metabolic processes;stress response;other biological processes	plasma membrane;other membranes	other molecular function	Pf00193	10894	hsa:10894; Q8TC18; Q9UNF4; Q9Y5Y7	ENSG00000133800		Hyaluronan uptake and degradation
O75882	ATRN	-1.29933	0.00126649	Not Significant	Attractin [OS=Homo sapiens]	cell adhesion;stress response;developmental processes;other biological processes	extracellular matrix;plasma membrane;other membranes;other cell component	other molecular function	Pf00059, Pf00431, Pf01344, Pf01437, Pf13964	8455	A8KAE5; hsa:8455; O60295; O75882; O95414; Q3MIT3; Q5TDA2; Q5TDA4; Q5VYW3; Q9NTQ3; Q9NTQ4; Q9NU01; Q9NZ57; Q9NZ58; Q9UC75; Q9UDF5	ENSG00000088812
P43652	AFM	-1.3034	0.00138559	Not Significant	Afamin [OS=Homo sapiens]	transport;other biological processes	non-structural extracellular;other cell component	other molecular function	Pf00273	173	A8K3E1; hsa:173; P43652; Q32MR3; Q4W5C5	ENSG00000079557
P25311	AZGP1	-1.30408	0.00302024	Not Significant	Zinc-alpha-2-glycoprotein [OS=Homo sapiens]	cell adhesion;RNA metabolism OR transcription;other metabolic processes;transport;other biological processes	non-structural extracellular;plasma membrane;other membranes	transporter activity;other molecular function	Pf00129, Pf07654	563	D6W5T8; hsa:563; O60386; P25311; Q5XKQ4; Q8N4N0	ENSG00000160862		Miscellaneous transport and binding events
P10721	KIT	-1.30493	0.051766	Not Significant	Mast/stem cell growth factor receptor Kit [OS=Homo sapiens]	cell adhesion;cell cycle OR cell proliferation;cell organization and biogenesis;protein metabolism;other metabolic processes;stress response;transport;developmental processes;signal transduction;other biological processes	non-structural extracellular;plasma membrane;other membranes;nucleus;other cell component	kinase activity;other molecular function	Pf00047, Pf07714	3815	B5A956; D5LXN2; D5M931; F5H8F8; hsa:3815; P10721; Q6IQ28; Q99662; Q9UM99	ENSG00000157404	Cardiac progenitor differentiation; Pluripotent stem cell differentiation pathway; Kit receptor signaling pathway; Imatinib and chronic myeloid leukemia; Focal adhesion: PI3K-Akt-mTOR-signaling pathway; PI3K-Akt signaling pathway; Ras signaling; Breast cancer pathway; Neovascularisation processes; Hippo signaling regulation pathways; Hippo-Merlin signaling dysregulation; Gastrin signaling pathway…	PIP3 activates AKT signaling; Constitutive Signaling by Aberrant PI3K in Cancer; PI5P, PP2A and IER3 Regulate PI3K/AKT Signaling; RAF/MAP kinase cascade; Signaling by phosphorylated juxtamembrane, extracellular and kinase domain KIT mutants; Regulation of KIT signaling; TFAP2 (AP-2) family regulates transcription of growth factors and their receptors; Dasatinib-resistant KIT mutants; Imatinib-res…
A0A0C4DH33	IGHV1-24	-1.30788	0.00744001	Not Significant	Immunoglobulin heavy variable 1-24 [OS=Homo sapiens]	cell organization and biogenesis;stress response;transport;signal transduction;other biological processes	non-structural extracellular;plasma membrane;other membranes	signal transduction activity or receptor binding;other molecular function	Pf07686		A0A0C4DH33	ENSG00000211950; ENSG00000282284
Q10588	BST1	-1.31057	0.00118271	Not Significant	ADP-ribosyl cyclase/cyclic ADP-ribose hydrolase 2 [OS=Homo sapiens]	signal transduction;other biological processes	non-structural extracellular;plasma membrane;other membranes;other cell component	other molecular function	Pf02267	683	B2R6A2; hsa:683; Q10588; Q1XII0; Q5U0K0; Q96EN3	ENSG00000109743	NAD+ biosynthetic pathways	Post-translational modification: synthesis of GPI-anchored proteins; Neutrophil degranulation; Nicotinate metabolism
P81605	DCD	-1.31875	0.0258945	Not Significant	Dermcidin [OS=Homo sapiens]	protein metabolism;stress response;other biological processes	non-structural extracellular	other molecular function	Pf15291	117159	A5JHP2; A5JHP3; hsa:117159; P58461; P81605; Q53YJ2	ENSG00000161634		Antimicrobial peptides
P54802	NAGLU	-1.32173	0.00158042	Not Significant	Alpha-N-acetylglucosaminidase [OS=Homo sapiens]	cell organization and biogenesis;other metabolic processes;developmental processes;other biological processes	non-structural extracellular;other cytoplasmic organelle	other molecular function	Pf05089, Pf12971, Pf12972	4669	hsa:4669; P54802	ENSG00000108784	Glycosaminoglycan degradation	HS-GAG degradation; MPS IIIB - Sanfilippo syndrome B
Q13228	SELENBP1	-1.32294	0.00756068	Not Significant	Methanethiol oxidase [OS=Homo sapiens]	transport	other membranes;cytosol;nucleus	other molecular function	Pf05694	8991	A6NML9; A6PVW9; B2RDR3; B4DKP6; B4E1F3; hsa:8991; Q13228; Q49AQ8; Q96GX7	ENSG00000143416	IL1 and megakaryocytes in obesity
P10909	CLU	-1.3319	0.000958139	Not Significant	Clusterin [OS=Homo sapiens]	cell cycle OR cell proliferation;cell organization and biogenesis;protein metabolism;other metabolic processes;stress response;transport;developmental processes;signal transduction;other biological processes	non-structural extracellular;other membranes;cytosol;mitochondrion;ER/Golgi;nucleus;other cell component	signal transduction activity or receptor binding;cytoskeletal activity;other molecular function	Pf01093	1191	B2R9Q1; B3KSE6; hsa:1191; P10909; P11380; P11381; Q2TU75; Q5HYC1; Q7Z5B9	ENSG00000120885	Male infertility; Complement system in neuronal development and plasticity; Complement and coagulation cascades	Regulation of Complement cascade; Platelet degranulation ; Terminal pathway of complement; Antimicrobial peptides
A0A0A0MS14	IGHV1-45	-1.33282	0.0494613	Not Significant	Immunoglobulin heavy variable 1-45 [OS=Homo sapiens]	cell organization and biogenesis;stress response;transport;signal transduction;other biological processes	non-structural extracellular;plasma membrane;other membranes	signal transduction activity or receptor binding;other molecular function	Pf07686		A0A0A0MS14	ENSG00000211961; ENSG00000282776
P20930	FLG	-1.33382	0.0278285	Not Significant	Filaggrin [OS=Homo sapiens]	protein metabolism;other metabolic processes;developmental processes	plasma membrane;cytosol;cytoskeleton;other cell component	bone, tooth or skin structural activity;other molecular function	Pf01023, Pf03516	2312	hsa:2312; P20930; Q01720; Q5T583; Q9UC71	ENSG00000143631		Formation of the cornified envelope
P12821	ACE	-1.33734	0.000379436	Not Significant	Angiotensin-converting enzyme [OS=Homo sapiens]	cell cycle OR cell proliferation;protein metabolism;other metabolic processes;transport;developmental processes;other biological processes	non-structural extracellular;plasma membrane;other membranes;other cytoplasmic organelle	signal transduction activity or receptor binding;cytoskeletal activity;other molecular function	Pf01401	1636	B0LPF0; B4DXI3; E7EU16; hsa:1636; P12821; P22966; Q53YX9; Q59GY8; Q7M4L4	ENSG00000159640	Renin-angiotensin-aldosterone system (RAAS); Conversion of angiotensinogen to angiotensin II ; SARS-CoV-2 and angiotensin-converting enzyme 2 receptor: molecular mechanisms; RAS and bradykinin pathways in COVID-19; ACE inhibitor pathway	Metabolism of Angiotensinogen to Angiotensins
P07942	LAMB1	-1.34528	0.00498226	Not Significant	Laminin subunit beta-1 [OS=Homo sapiens]	cell adhesion;cell organization and biogenesis;developmental processes;other biological processes	non-structural extracellular;extracellular matrix;ER/Golgi;other cell component	signal transduction activity or receptor binding;extracellular structural activity;other molecular function	Pf00053, Pf00055	3912	hsa:3912; P07942; Q14D91	ENSG00000091136	Alpha 6 beta 4 signaling pathway; Complement system; Focal adhesion; Focal adhesion: PI3K-Akt-mTOR-signaling pathway; PI3K-Akt signaling pathway; Inflammatory response pathway; Small cell lung cancer; Malignant pleural mesothelioma	Regulation of Insulin-like Growth Factor (IGF) transport and uptake by Insulin-like Growth Factor Binding Proteins (IGFBPs); Post-translational protein phosphorylation; Degradation of the extracellular matrix; Non-integrin membrane-ECM interactions; ECM proteoglycans; L1CAM interactions; Laminin interactions; MET activates PTK2 signaling; EGR2 and SOX10-mediated initiation of Schwann cell myelina…
Q9NZ08	ERAP1	-1.35332	0.00228364	Not Significant	Endoplasmic reticulum aminopeptidase 1 [OS=Homo sapiens]	protein metabolism;other metabolic processes;developmental processes;signal transduction;other biological processes	non-structural extracellular;plasma membrane;other membranes;cytosol;ER/Golgi;other cell component	signal transduction activity or receptor binding;other molecular function	Pf01433, Pf11838, Pf17900	51752	hsa:51752; O60278; Q6UWY6; Q8NEL4; Q8TAD0; Q9NZ08; Q9UHF8; Q9UKY2	ENSG00000164307		Antigen Presentation: Folding, assembly and peptide loading of class I MHC
P27487	DPP4	-1.3697	0.00079021	Not Significant	Dipeptidyl peptidase 4 [OS=Homo sapiens]	cell adhesion;protein metabolism;stress response;signal transduction;other biological processes	non-structural extracellular;plasma membrane;other membranes;other cell component	signal transduction activity or receptor binding;other molecular function	Pf00326, Pf00930	1803	hsa:1803; P27487; Q53TN1	ENSG00000197635		Synthesis, secretion, and inactivation of Glucagon-like Peptide-1 (GLP-1); Synthesis, secretion, and inactivation of Glucose-dependent Insulinotropic Polypeptide (GIP)
P12109	COL6A1	-1.38255	0.000135155	Not Significant	Collagen alpha-1(VI) chain [OS=Homo sapiens]	cell adhesion;developmental processes;other biological processes	non-structural extracellular;plasma membrane;other membranes;ER/Golgi;other cell component	extracellular structural activity;other molecular function	Pf00092, Pf01391	1291	hsa:1291; O00117; O00118; P12109; Q14040; Q14041; Q16258; Q7Z645; Q9BSA8	ENSG00000142156	miRNA targets in ECM and membrane receptors; PI3K-Akt signaling pathway	Signaling by PDGF; Integrin cell surface interactions; ECM proteoglycans; Collagen degradation; Assembly of collagen fibrils and other multimeric structures; NCAM1 interactions; Collagen chain trimerization
Q13508	ART3	-1.38964	0.00152201	Not Significant	Ecto-ADP-ribosyltransferase 3 [OS=Homo sapiens]	protein metabolism;other metabolic processes	non-structural extracellular;plasma membrane;other membranes	other molecular function	Pf01129	419	hsa:419; Q13508; Q53XW3; Q6FHT7; Q8WVJ7; Q93069; Q96HL1	ENSG00000156219		Post-translational modification: synthesis of GPI-anchored proteins
Q99497	PARK7	-1.39274	0.000133265	Not Significant	Parkinson disease protein 7 [OS=Homo sapiens]	cell-cell signaling;cell organization and biogenesis;protein metabolism;DNA metabolism;other metabolic processes;stress response;transport;signal transduction;other biological processes	plasma membrane;other membranes;cytosol;mitochondrion;ER/Golgi;nucleus;other cell component	signal transduction activity or receptor binding;enzyme regulator activity;nucleic acid binding activity;other molecular function	Pf01965	11315	B2R4Z1; hsa:11315; O14805; Q6DR95; Q7LFU2; Q99497	ENSG00000116288	Androgen receptor signaling pathway; Synaptic vesicle pathway; Parkinson's disease pathway	Late endosomal microautophagy; Chaperone Mediated Autophagy; Aggrephagy; SUMOylation of transcription cofactors
Q13790	APOF	-1.39467	4.18185e-05	Not Significant	Apolipoprotein F [OS=Homo sapiens]	other metabolic processes;transport	non-structural extracellular	signal transduction activity or receptor binding;transporter activity;other molecular function	Pf15148	319	hsa:319; Q13790; Q8TC13	ENSG00000175336		LDL remodeling
Q9HDC9	APMAP	-1.39586	0.000243979	Not Significant	Adipocyte plasma membrane-associated protein [OS=Homo sapiens]	other metabolic processes	other membranes;other cell component	other molecular function	Pf03088, Pf20067	57136	A8K514; B4DXG1; hsa:57136; Q6UVZ8; Q9GZS8; Q9HDC9; Q9NUB2	ENSG00000101474	Ciliary landscape
Q12913	PTPRJ	-1.39771	3.30794e-05	Not Significant	Receptor-type tyrosine-protein phosphatase eta [OS=Homo sapiens]	protein metabolism;other metabolic processes;developmental processes;signal transduction;other biological processes	plasma membrane;other membranes;other cell component	signal transduction activity or receptor binding;other molecular function	Pf00041, Pf00102, Pf18861	5795	hsa:5795; Q12913; Q15255; Q6P4H4; Q8NHM2; Q9UDA9	ENSG00000149177	VEGFA-VEGFR2 signaling pathway	Neutrophil degranulation; Phosphorylation of CD3 and TCR zeta chains; Negative regulation of FLT3; Negative regulation of MET activity
P02652	APOA2	-1.41136	0.000156644	Not Significant	Apolipoprotein A-II [OS=Homo sapiens]	cell organization and biogenesis;protein metabolism;other metabolic processes;stress response;transport;developmental processes;other biological processes	non-structural extracellular;cytosol;ER/Golgi;other cytoplasmic organelle	signal transduction activity or receptor binding;transporter activity;enzyme regulator activity;other molecular function	Pf04711	336	B2R524; hsa:336; P02652	ENSG00000158874	PPAR-alpha pathway; Nuclear receptors meta-pathway; PPAR signaling pathway; Statin inhibition of cholesterol production; Familial hyperlipidemia type 1; Familial hyperlipidemia type 2; Familial hyperlipidemia type 3; Familial hyperlipidemia type 4; Familial hyperlipidemia type 5	Regulation of Insulin-like Growth Factor (IGF) transport and uptake by Insulin-like Growth Factor Binding Proteins (IGFBPs); Post-translational protein phosphorylation; Retinoid metabolism and transport; PPARA activates gene expression; Chylomicron assembly; Chylomicron remodeling
P33151	CDH5	-1.42475	0.000107993	Not Significant	Cadherin-5 [OS=Homo sapiens]	cell adhesion;cell organization and biogenesis;developmental processes;signal transduction;other biological processes	plasma membrane;other membranes;nucleus;other cell component	signal transduction activity or receptor binding;other molecular function	Pf00028, Pf01049	1003	hsa:1003; P33151; Q4VAI5; Q4VAI6	ENSG00000179776	VEGFA-VEGFR2 signaling pathway; Hippo signaling regulation pathways; Hippo-Merlin signaling dysregulation; Netrin-UNC5B signaling pathway; Malignant pleural mesothelioma; CCL18 signaling pathway	VEGFR2 mediated vascular permeability; Adherens junctions interactions
Q07954	LRP1	-1.42487	1.56588e-05	Not Significant	Prolow-density lipoprotein receptor-related protein 1 [OS=Homo sapiens]	cell cycle OR cell proliferation;cell organization and biogenesis;protein metabolism;other metabolic processes;transport;developmental processes;signal transduction;other biological processes	plasma membrane;other membranes;cytoskeleton;ER/Golgi;nucleus;other cytoplasmic organelle;other cell component	signal transduction activity or receptor binding;other molecular function	Pf00057, Pf00058, Pf07645, Pf12662, Pf14670, Pf16472	4035	hsa:4035; Q07954; Q2PP12; Q86SW0; Q8IVG8	ENSG00000123384	Alzheimer's disease and miRNA effects; Regulation of Wnt / B-catenin signaling by small molecule compounds; Statin inhibition of cholesterol production; Familial hyperlipidemia type 1; Familial hyperlipidemia type 3; Familial hyperlipidemia type 4; Familial hyperlipidemia type 5; Alzheimer's disease	Scavenging of heme from plasma; Retinoid metabolism and transport
P11279	LAMP1	-1.44493	4.77964e-05	Not Significant	Lysosome-associated membrane glycoprotein 1 [OS=Homo sapiens]	transport;signal transduction;other biological processes	plasma membrane;other membranes;cytosol;ER/Golgi;other cytoplasmic organelle;other cell component	other molecular function	Pf01299	3916	B4DWL3; hsa:3916; P11279; Q8WU33; Q96I40; Q9BRD2; Q9NP13	ENSG00000185896	Senescence and autophagy in cancer	Neutrophil degranulation
Q6UXB8	PI16	-1.48106	0.000391644	Not Significant	Peptidase inhibitor 16 [OS=Homo sapiens]	other biological processes	non-structural extracellular	enzyme regulator activity	Pf00188	221476	hsa:221476; Q6UXB8; Q6ZVG9; Q8IYL8; Q8NBK0; Q8TCB8	ENSG00000164530
P13598	ICAM2	-1.48137	0.000247805	Not Significant	Intercellular adhesion molecule 2 [OS=Homo sapiens]	cell adhesion	plasma membrane;other membranes;other cell component	signal transduction activity or receptor binding	Pf03921	3384	hsa:3384; P13598; Q14600	ENSG00000108622	Complement system; Ebola virus pathway in host	Immunoregulatory interactions between a Lymphoid and a non-Lymphoid cell; Integrin cell surface interactions; CD209 (DC-SIGN) signaling
Q9Y4L1	HYOU1	-1.49792	3.74737e-06	Not Significant	Hypoxia up-regulated protein 1 [OS=Homo sapiens]	stress response;transport;other biological processes	non-structural extracellular;ER/Golgi;other cell component	other molecular function	Pf00012	10525	A8C1Z0; B7Z909; hsa:10525; Q2I204; Q53H25; Q9Y4L1	ENSG00000149428; ENSG00000280682	VEGFA-VEGFR2 signaling pathway	Scavenging by Class F Receptors; XBP1(S) activates chaperone genes
P05362	ICAM1	-1.50804	3.74926e-06	Down	Intercellular adhesion molecule 1 [OS=Homo sapiens]	cell adhesion;cell organization and biogenesis;stress response;developmental processes;other biological processes	non-structural extracellular;plasma membrane;other membranes	signal transduction activity or receptor binding;other molecular function	Pf03921	3383	B2R6M3; hsa:3383; P05362; Q5NKV7; Q96B50	ENSG00000090339	Selenium micronutrient network; Vitamin B12 metabolism; Folate metabolism; RANKL/RANK signaling pathway; Interleukin-11 signaling pathway; Spinal cord injury; Complement system; IL1 and megakaryocytes in obesity; Photodynamic therapy-induced NF-kB survival signaling; VEGFA-VEGFR2 signaling pathway; miRNAs involvement in the immune response in sepsis; Cells and molecules involved in local acute in…	Immunoregulatory interactions between a Lymphoid and a non-Lymphoid cell; Interleukin-4 and Interleukin-13 signaling; Integrin cell surface interactions; Interferon gamma signaling; Interleukin-10 signaling
P51884	LUM	-1.51519	1.74168e-05	Down	Lumican [OS=Homo sapiens]	cell organization and biogenesis;developmental processes;other biological processes	extracellular matrix;ER/Golgi;other cytoplasmic organelle	extracellular structural activity;other molecular function	Pf01462, Pf13516, Pf13855	4060	B2R6R5; hsa:4060; P51884; Q96QM7	ENSG00000139329		Integrin cell surface interactions; ECM proteoglycans; Keratan sulfate biosynthesis; Keratan sulfate degradation; Defective CHST6 causes MCDC1; Defective ST3GAL3 causes MCT12 and EIEE15; Defective B4GALT1 causes B4GALT1-CDG (CDG-2d)
P13796	LCP1	-1.51851	1.53199e-05	Down	Plastin-2 [OS=Homo sapiens]	cell organization and biogenesis;developmental processes;signal transduction;other biological processes	plasma membrane;other membranes;cytosol;cytoskeleton;other cell component	signal transduction activity or receptor binding;cytoskeletal activity;other molecular function	Pf00036, Pf00307	3936	B2R613; B4DUA0; hsa:3936; P13796; Q5TBN4	ENSG00000136167		Gene and protein expression by JAK-STAT signaling after Interleukin-12 stimulation
P16070	CD44	-1.52699	2.34823e-05	Down	CD44 antigen [OS=Homo sapiens]	cell adhesion;other metabolic processes;stress response;developmental processes;signal transduction;other biological processes	plasma membrane;other membranes;cytosol;ER/Golgi;other cell component	other molecular function	Pf00193	960	A5YRN9; B6EAT9; D3DR12; D3DR13; hsa:960; O95370; P16070; P22511; Q04858; Q13419; Q13957; Q13958; Q13959; Q13960; Q13961; Q13967; Q13968; Q13980; Q15861; Q16064; Q16065; Q16066; Q16208; Q16522; Q86T72; Q86Z27; Q8N694; Q92493; Q96J24; Q9H5A5; Q9UC28; Q9UC29; Q9UC30; Q9UCB0; Q9UJ36	ENSG00000026508	Hepatitis C and hepatocellular carcinoma; Wnt signaling pathway and pluripotency; Hippo-Merlin signaling dysregulation; Gastrin signaling pathway; Malignant pleural mesothelioma; CCL18 signaling pathway; Senescence and autophagy in cancer	Cell surface interactions at the vascular wall; Neutrophil degranulation; Degradation of the extracellular matrix; Integrin cell surface interactions; Interferon gamma signaling; Hyaluronan uptake and degradation
Q04756	HGFAC	-1.5681	9.49186e-05	Down	Hepatocyte growth factor activator [OS=Homo sapiens]	protein metabolism;other metabolic processes;stress response	non-structural extracellular;cytosol;ER/Golgi	other molecular function	Pf00008, Pf00040, Pf00051, Pf00089	3083	hsa:3083; Q04756; Q14726; Q2M1W7; Q53X47	ENSG00000109758		MET Receptor Activation
P02765	AHSG	-1.62842	3.56677e-05	Down	Alpha-2-HS-glycoprotein [OS=Homo sapiens]	stress response;transport;developmental processes;other biological processes	extracellular matrix;ER/Golgi;other cell component	enzyme regulator activity	Pf00031	197	A8K9N6; B2R7G1; hsa:197; O14961; O14962; P02765; Q9P152	ENSG00000145192		Regulation of Insulin-like Growth Factor (IGF) transport and uptake by Insulin-like Growth Factor Binding Proteins (IGFBPs); Post-translational protein phosphorylation; Neutrophil degranulation; Platelet degranulation
P07477	PRSS1	-1.66663	1.75318e-06	Down	Trypsin-1 [OS=Homo sapiens]	cell organization and biogenesis;protein metabolism;other biological processes	non-structural extracellular	other molecular function	Pf00089	5644	A1A509; A6NJ71; B2R5I5; hsa:5644; P07477; Q5NV57; Q7M4N3; Q7M4N4; Q92955; Q9HAN4; Q9HAN5; Q9HAN6; Q9HAN7	ENSG00000204983; ENSG00000274247		Activation of Matrix Metalloproteinases; Cobalamin (Cbl, vitamin B12) transport and metabolism
Q86YZ3	HRNR	-1.67707	3.89537e-05	Down	Hornerin [OS=Homo sapiens]	cell organization and biogenesis;developmental processes	non-structural extracellular;plasma membrane;other cytoplasmic organelle;other cell component	other molecular function	Pf01023	388697	hsa:388697; Q5DT20; Q5U1F4; Q86YZ3	ENSG00000197915		Neutrophil degranulation
