# Supplementary material for: Plasma Proteins Associated with COVID-19 Severity in Puerto Rico
Source: Int J Mol Sci. 2024 May 16;25(10):5426. doi: 10.3390/ijms25105426 (PMC11121485; doi:10.3390/ijms25105426)
Supplement: Supplementary file 1 [file ijms-25-05426-s001.zip › Table S5-LXR-RXR Activation.xlsx]

## Sheet: LXR-RXR Activation
Protein	FC	p-value	References related to COVID-19 severity
AHSG	-2.60131	4.48532e-08	Also known as Fetuin A; Kukla et al 2021 [75] and Kurt et el 2022 [76] found decreased Fetuin A with severity
APOA2	-2.15593	9.69928e-08	di Flora et al 2023 [77] and Lipman et al 2023 [78] showed decreased APOA2 associated with severity
PON1	-2.13347	1.68631e-07	Decreased PON1 is associated with disease severity [26,33,45,46]
KNG1	-2.1264	5.46259e-08
ITIH4	-1.86939	6.83856e-06
PON3	-1.80215	0.000155309
APOF	-1.80141	7.47485e-06
LCAT	-1.69817	6.04401e-06
PCYOX1	-1.67637	5.79154e-05
CD14	-1.63757	1.37181e-05
TF	-1.51886	7.62294e-05
Top 3 proteins based on Fold Change
