# Supplementary material for: Plasma Proteins Associated with COVID-19 Severity in Puerto Rico
Source: Int J Mol Sci. 2024 May 16;25(10):5426. doi: 10.3390/ijms25105426 (PMC11121485; doi:10.3390/ijms25105426)
Supplement: Supplementary file 1 [file ijms-25-05426-s001.zip › Table S6-Production of NO and ROS in Macrophages.xlsx]

## Sheet: Production of NO and ROS
Protein	FC	p-value	References related to COVID-19 severity
APOA2	-2.15593	9.69928e-08	di Flora et al 2023 [77] and Lipman et al 2023 [78] showed decreased APOA2 associated with severity
PON1	-2.13347	1.68631e-07	Decreased PON1 is associated with disease severity [26,33,45,46]
APOF	-1.80141	7.47485e-06	Begue et al 2021 [45] showed decreased APOF with severity; Souza Junior et al 2021 [79] showed increased APOF with severity
PCYOX1	-1.67637	5.79154e-05
Top 3 proteins based on Fold Change
