# Supplementary material for: Plasma Proteins Associated with COVID-19 Severity in Puerto Rico
Source: Int J Mol Sci. 2024 May 16;25(10):5426. doi: 10.3390/ijms25105426 (PMC11121485; doi:10.3390/ijms25105426)
Supplement: Supplementary file 1 [file ijms-25-05426-s001.zip › Table S7-Synaptogenesis Signaling Pathway.xlsx]

## Sheet: Synaptogenesis Signaling
Protein	FC	p-value	References related to COVID-19 severity
CDH5	-1.99497	8.63365e-07	Also known as VE-cadherin; Qin et al 2021 found decreased VE-cadherin with severity [80].
COMP	-1.82795	2.5577e-06	Byeon et al 2022 found decreased COMP with disease severity [55]; Huet el at 2023 found decreased COMP in patients with Osteoartritis after COVID-19 [81]
CDH13	-1.76142	6.69434e-05	None
LRP1	-1.54238	0.000335163
Top 3 proteins based on Fold Change
