# Supplementary material for: Plasma Proteins Associated with COVID-19 Severity in Puerto Rico
Source: Int J Mol Sci. 2024 May 16;25(10):5426. doi: 10.3390/ijms25105426 (PMC11121485; doi:10.3390/ijms25105426)
Supplement: Supplementary file 1 [file ijms-25-05426-s001.zip › Table S8-Proteins Selected for Validation.xlsx]

## Sheet: Validation from Severe List
Accession	Gene.Symbol	FC	P.Value	Significance	Description	Biological.Process	Cellular.Component	Molecular.Function	Pfam.IDs	Entrez.Gene.ID	Gene.ID	Ensembl.Gene.ID	WikiPathways	Reactome.Pathways
P69905	HBA1; HBA2	1.63856	0.00163458	Up	Hemoglobin subunit alpha [OS=Homo sapiens]	other metabolic processes;stress response;transport;other biological processes	non-structural extracellular;cytosol;translational apparatus;other cell component	other molecular function	Pf00042	3039; 3040	hsa:3039; hsa:3040; P01922; P69905; Q1HDT5; Q3MIF5; Q53F97; Q96KF1; Q9NYR7; Q9UCM0	ENSG00000188536; ENSG00000206172	Selenium micronutrient network; Vitamin B12 metabolism; Folate metabolism; Effects of nitric oxide	Scavenging of heme from plasma; Erythrocytes take up carbon dioxide and release oxygen; Erythrocytes take up oxygen and release carbon dioxide; Heme signaling; Cytoprotection by HMOX1
P02743	APCS	1.57791	0.00103958	Up	Serum amyloid P-component [OS=Homo sapiens]	cell organization and biogenesis;stress response;other biological processes	non-structural extracellular	other molecular function	Pf00354	325	hsa:325; P02743	ENSG00000132703	Complement system	Amyloid fiber formation
P05362	ICAM1	-1.61905	4.58095e-05	Down	Intercellular adhesion molecule 1 [OS=Homo sapiens]	cell adhesion;cell organization and biogenesis;stress response;developmental processes;other biological processes	non-structural extracellular;plasma membrane;other membranes	signal transduction activity or receptor binding;other molecular function	Pf03921	3383	B2R6M3; hsa:3383; P05362; Q5NKV7; Q96B50	ENSG00000090339	Selenium micronutrient network; Vitamin B12 metabolism; Folate metabolism; RANKL/RANK signaling pathway; Interleukin-11 signaling pathway; Spinal cord injury; Complement system; IL1 and megakaryocytes in obesity; Photodynamic therapy-induced NF-kB survival signaling; VEGFA-VEGFR2 signaling pathway; miRNAs involvement in the immune response in sepsis; Cells and molecules involved in local acute in…	Immunoregulatory interactions between a Lymphoid and a non-Lymphoid cell; Interleukin-4 and Interleukin-13 signaling; Integrin cell surface interactions; Interferon gamma signaling; Interleukin-10 signaling
P55290	CDH13	-1.76142	6.69434e-05	Down	Cadherin-13 [OS=Homo sapiens]	cell adhesion;cell cycle OR cell proliferation;cell organization and biogenesis;developmental processes;signal transduction;other biological processes	non-structural extracellular;plasma membrane;other membranes;other cell component	other molecular function	Pf00028, Pf08758	1012	A8W476; A8W477; B7Z590; C9JRI6; hsa:1012; J3KN62; P55290; Q6GTW4; Q8TBX3	ENSG00000140945	Clear cell renal cell carcinoma pathways; Hippo signaling regulation pathways; Hippo-Merlin signaling dysregulation; Malignant pleural mesothelioma	Adherens junctions interactions
P14151	SELL	-2.00523	7.7309e-07	Down	L-selectin [OS=Homo sapiens]	cell adhesion	plasma membrane;other membranes	other molecular function	Pf00059, Pf00084	6402	A0A024R8Z0; B2R6Q8; hsa:6402; P14151; P15023; Q9UJ43	ENSG00000188404	Complement system	Immunoregulatory interactions between a Lymphoid and a non-Lymphoid cell; Cell surface interactions at the vascular wall; Neutrophil degranulation
P01042-2	KNG1	-2.1264	5.46259e-08	Down	Isoform LMW of Kininogen-1 [OS=Homo sapiens]						P01042-2
P27169	PON1	-2.13347	1.68631e-07	Down	Serum paraoxonase/arylesterase 1 [OS=Homo sapiens]	other metabolic processes;other biological processes	non-structural extracellular;other cell component	other molecular function	Pf01731	5444	B2RA40; hsa:5444; P27169; Q16052; Q6B0J6; Q9UCB1	ENSG00000005421	Phase I biotransformations, non P450; Male infertility	Synthesis of 5-eicosatetraenoic acids
P02652	APOA2	-2.15593	9.69928e-08	Down	Apolipoprotein A-II [OS=Homo sapiens]	cell organization and biogenesis;protein metabolism;other metabolic processes;stress response;transport;developmental processes;other biological processes	non-structural extracellular;cytosol;ER/Golgi;other cytoplasmic organelle	signal transduction activity or receptor binding;transporter activity;enzyme regulator activity;other molecular function	Pf04711	336	B2R524; hsa:336; P02652	ENSG00000158874	PPAR-alpha pathway; Nuclear receptors meta-pathway; PPAR signaling pathway; Statin inhibition of cholesterol production; Familial hyperlipidemia type 1; Familial hyperlipidemia type 2; Familial hyperlipidemia type 3; Familial hyperlipidemia type 4; Familial hyperlipidemia type 5	Regulation of Insulin-like Growth Factor (IGF) transport and uptake by Insulin-like Growth Factor Binding Proteins (IGFBPs); Post-translational protein phosphorylation; Retinoid metabolism and transport; PPARA activates gene expression; Chylomicron assembly; Chylomicron remodeling
Upregulated
Downregulated
